# Supplementary material for: Computational survey of peptides derived from disulphide-bonded protein loops that may serve as mediators of protein-protein interactions
Source: PubMed Central journal article supplement (PMC4262234; doi:10.1186/1471-2105-15-305), 2014-09-17
Supplement: 12859_2014_6691_MOESM1_ESM.pdf [file 12859_2014_6691_MOESM1_ESM.pdf]

Additional file 1: Table S3: Disulphide loops at the surface of PDB proteins.

| <b>PDB-ID</b> | <b>Chain-ID</b> | <b>Start</b> | <b>End</b> |
|---------------|-----------------|--------------|------------|
| 11BA          | A               | 65           | 72         |
| 11BA          | B               | 65           | 72         |
| 153L          | A               | 18           | 29         |
| 1A0M          | A               | 2            | 8          |
| 1A0M          | B               | 2            | 8          |
| 1A14          | N               | 124          | 129        |
| 1A14          | N               | 232          | 237        |
| 1A14          | N               | 280          | 289        |
| 1A21          | A               | 47           | 55         |
| 1A22          | A               | 182          | 189        |
| 1A22          | B               | 238          | 248        |
| 1A22          | B               | 283          | 294        |
| 1A2W          | A               | 65           | 72         |
| 1A2W          | B               | 65           | 72         |
| 1A39          | A               | 18           | 24         |
| 1A39          | A               | 63           | 69         |
| 1A39          | A               | 223          | 228        |
| 1A4G          | A               | 121          | 126        |

Additional file 1: Table S3: Disulphide loops at the surface of PDB proteins.

| <b>PDB-ID</b> | <b>Chain-ID</b> | <b>Start</b> | <b>End</b> |
|---------------|-----------------|--------------|------------|
| 1A4G          | A               | 230          | 235        |
| 1A4G          | A               | 278          | 288        |
| 1A4G          | B               | 121          | 126        |
| 1A4G          | B               | 230          | 235        |
| 1A4G          | B               | 278          | 288        |
| 1A7S          | A               | 154          | 160        |
| 1A8E          | A               | 171          | 177        |
| 1A8X          | A               | 50           | 57         |
| 1A8X          | A               | 478          | 489        |
| 1AB1          | A               | 16           | 26         |
| 1ACJ          | A               | 254          | 265        |
| 1ACX          | A               | 34           | 43         |
| 1ACX          | A               | 83           | 88         |
| 1AGM          | A               | 262          | 270        |
| 1AGY          | A               | 171          | 178        |
| 1AHW          | C               | 49           | 57         |
| 1AHW          | F               | 49           | 57         |
| 1AIV          | A               | 171          | 182        |
| 1AJA          | A               | 168          | 178        |

Additional file 1: Table S3: Disulphide loops at the surface of PDB proteins.

| <b>PDB-ID</b> | <b>Chain-ID</b> | <b>Start</b> | <b>End</b> |
|---------------|-----------------|--------------|------------|
| 1AJA          | B               | 168          | 178        |
| 1AK0          | A               | 80           | 85         |
| 1AKG          | A               | 2            | 8          |
| 1AKN          | A               | 246          | 257        |
| 1AKP          | A               | 37           | 47         |
| 1AKP          | A               | 88           | 95         |
| 1ALU          | A               | 44           | 50         |
| 1ALU          | A               | 73           | 83         |
| 1AM5          | A               | 45           | 50         |
| 1AM5          | A               | 206          | 210        |
| 1AMP          | A               | 223          | 227        |
| 1AN3          | A               | 180          | 188        |
| 1AN3          | B               | 14           | 24         |
| 1AN3          | B               | 53           | 64         |
| 1AN3          | C               | 14           | 24         |
| 1AN3          | C               | 53           | 64         |
| 1AO6          | A               | 53           | 62         |
| 1AO6          | A               | 90           | 101        |
| 1AO6          | A               | 168          | 177        |

Additional file 1: Table S3: Disulphide loops at the surface of PDB proteins.

| <b>PDB-ID</b> | <b>Chain-ID</b> | <b>Start</b> | <b>End</b> |
|---------------|-----------------|--------------|------------|
| 1AO6          | A               | 245          | 253        |
| 1AO6          | A               | 278          | 289        |
| 1AO6          | A               | 360          | 369        |
| 1AO6          | A               | 437          | 448        |
| 1AO6          | A               | 476          | 487        |
| 1AO6          | A               | 558          | 567        |
| 1AOG          | A               | 53           | 58         |
| 1AOG          | B               | 53           | 58         |
| 1AOL          | A               | 73           | 83         |
| 1AOL          | A               | 178          | 184        |
| 1APH          | A               | 6            | 11         |
| 1APY          | A               | 41           | 46         |
| 1APY          | C               | 41           | 46         |
| 1AQB          | A               | 120          | 129        |
| 1AQH          | A               | 328          | 335        |
| 1ATJ          | A               | 44           | 49         |
| 1ATJ          | B               | 44           | 49         |
| 1ATJ          | C               | 44           | 49         |
| 1ATJ          | D               | 44           | 49         |

Additional file 1: Table S3: Disulphide loops at the surface of PDB proteins.

| <b>PDB-ID</b> | <b>Chain-ID</b> | <b>Start</b> | <b>End</b> |
|---------------|-----------------|--------------|------------|
| 1ATJ          | E               | 44           | 49         |
| 1ATJ          | F               | 44           | 49         |
| 1ATL          | A               | 157          | 164        |
| 1ATL          | B               | 157          | 164        |
| 1AUK          | A               | 161          | 168        |
| 1AUK          | A               | 493          | 499        |
| 1AUN          | A               | 52           | 62         |
| 1AUN          | A               | 67           | 73         |
| 1AUN          | A               | 134          | 144        |
| 1AUN          | A               | 148          | 157        |
| 1AUN          | A               | 158          | 163        |
| 1AUT          | L               | 59           | 64         |
| 1AUT          | L               | 80           | 89         |
| 1AUT          | L               | 98           | 109        |
| 1AVA          | C               | 144          | 148        |
| 1AVF          | A               | 45           | 50         |
| 1AVF          | A               | 208          | 212        |
| 1AVU          | A               | 136          | 145        |
| 1AYP          | A               | 77           | 88         |

Additional file 1: Table S3: Disulphide loops at the surface of PDB proteins.

| <b>PDB-ID</b> | <b>Chain-ID</b> | <b>Start</b> | <b>End</b> |
|---------------|-----------------|--------------|------------|
| 1AYP          | F               | 77           | 88         |
| 1AZ7          | A               | 7            | 18         |
| 1AZ7          | A               | 53           | 62         |
| 1B0L          | A               | 170          | 181        |
| 1B0L          | A               | 627          | 632        |
| 1B12          | A               | 170          | 176        |
| 1B17          | A               | 6            | 11         |
| 1B1X          | A               | 170          | 181        |
| 1B1X          | A               | 625          | 630        |
| 1B1Z          | A               | 87           | 98         |
| 1B1Z          | B               | 87           | 98         |
| 1B1Z          | C               | 87           | 98         |
| 1B1Z          | D               | 87           | 98         |
| 1B2M          | A               | 2            | 10         |
| 1B2Y          | A               | 378          | 384        |
| 1B30          | A               | 256          | 262        |
| 1B37          | A               | 457          | 463        |
| 1B3E          | A               | 171          | 177        |
| 1B3J          | A               | 36           | 41         |

Additional file 1: Table S3: Disulphide loops at the surface of PDB proteins.

| <b>PDB-ID</b> | <b>Chain-ID</b> | <b>Start</b> | <b>End</b> |
|---------------|-----------------|--------------|------------|
| 1B41          | B               | 41           | 52         |
| 1B41          | B               | 53           | 59         |
| 1B56          | A               | 120          | 127        |
| 1B5F          | A               | 45           | 50         |
| 1B5F          | A               | 206          | 210        |
| 1B5F          | C               | 45           | 50         |
| 1B5F          | C               | 206          | 210        |
| 1B6E          | A               | 59           | 70         |
| 1B6E          | A               | 61           | 72         |
| 1B90          | A               | 91           | 99         |
| 1B9S          | A               | 122          | 127        |
| 1B9S          | A               | 231          | 236        |
| 1B9S          | A               | 279          | 289        |
| 1BBI          | A               | 14           | 22         |
| 1BBI          | A               | 32           | 39         |
| 1BBI          | A               | 41           | 49         |
| 1BBS          | A               | 45           | 50         |
| 1BBS          | A               | 206          | 210        |
| 1BCP          | B               | 192          | 199        |

Additional file 1: Table S3: Disulphide loops at the surface of PDB proteins.

| <b>PDB-ID</b> | <b>Chain-ID</b> | <b>Start</b> | <b>End</b> |
|---------------|-----------------|--------------|------------|
| 1BCP          | C               | 192          | 199        |
| 1BCP          | D               | 103          | 109        |
| 1BCP          | E               | 103          | 109        |
| 1BCP          | F               | 92           | 98         |
| 1BGC          | A               | 37           | 43         |
| 1BGC          | A               | 65           | 75         |
| 1BGD          | A               | 37           | 43         |
| 1BGD          | A               | 65           | 75         |
| 1BHE          | A               | 89           | 99         |
| 1BHP          | A               | 16           | 25         |
| 1BHT          | A               | 74           | 84         |
| 1BHT          | B               | 374          | 384        |
| 1BIY          | A               | 170          | 181        |
| 1BIY          | A               | 625          | 630        |
| 1BJ3          | A               | 2            | 13         |
| 1BJ3          | B               | 2            | 13         |
| 1BJ7          | A               | 44           | 48         |
| 1BK7          | A               | 15           | 23         |
| 1BK7          | A               | 168          | 179        |



Additional file 1: Table S3: Disulphide loops at the surface of PDB proteins.

| <b>PDB-ID</b> | <b>Chain-ID</b> | <b>Start</b> | <b>End</b> |
|---------------|-----------------|--------------|------------|
| 1BLF          | A               | 170          | 181        |
| 1BLF          | A               | 625          | 630        |
| 1BML          | A               | 558          | 566        |
| 1BML          | B               | 558          | 566        |
| 1BMO          | A               | 55           | 66         |
| 1BMO          | B               | 55           | 66         |
| 1BOQ          | A               | 101          | 111        |
| 1BP3          | A               | 182          | 189        |
| 1BP3          | B               | 212          | 222        |
| 1BP3          | B               | 251          | 262        |
| 1BQQ          | T               | 1133         | 1138       |
| 1BQU          | A               | 16           | 26         |
| 1BQU          | A               | 54           | 64         |
| 1BQU          | B               | 16           | 26         |
| 1BQU          | B               | 54           | 64         |
| 1BR9          | A               | 133          | 138        |
| 1BRP          | A               | 120          | 129        |
| 1BS9          | A               | 46           | 52         |
| 1BS9          | A               | 171          | 178        |

Additional file 1: Table S3: Disulphide loops at the surface of PDB proteins.

| <b>PDB-ID</b> | <b>Chain-ID</b> | <b>Start</b> | <b>End</b> |
|---------------|-----------------|--------------|------------|
| 1BST          | A               | 181          | 189        |
| 1BSW          | A               | 159          | 164        |
| 1BTE          | A               | 86           | 91         |
| 1BTE          | B               | 86           | 91         |
| 1BU8          | A               | 4            | 10         |
| 1BU8          | A               | 90           | 101        |
| 1BU8          | A               | 285          | 296        |
| 1BU8          | A               | 299          | 304        |
| 1BVN          | P               | 378          | 384        |
| 1BWC          | A               | 58           | 63         |
| 1BX7          | A               | 6            | 17         |
| 1BX7          | A               | 11           | 22         |
| 1BY2          | A               | 75           | 85         |
| 1BY3          | A               | 318          | 329        |
| 1BY3          | A               | 692          | 698        |
| 1BZI          | A               | 130          | 141        |
| 1C2A          | A               | 15           | 23         |
| 1C2A          | A               | 32           | 39         |
| 1C2A          | A               | 74           | 82         |

Additional file 1: Table S3: Disulphide loops at the surface of PDB proteins.

| <b>PDB-ID</b> | <b>Chain-ID</b> | <b>Start</b> | <b>End</b> |
|---------------|-----------------|--------------|------------|
| 1C2A          | A               | 91           | 98         |
| 1C3A          | A               | 4            | 15         |
| 1C3A          | B               | 204          | 215        |
| 1C5M          | D               | 22           | 27         |
| 1C5M          | F               | 1            | 12         |
| 1C7S          | A               | 56           | 66         |
| 1C7S          | A               | 400          | 408        |
| 1C8D          | A               | 490          | 494        |
| 1C8E          | A               | 490          | 494        |
| 1C9P          | B               | 10           | 21         |
| 1C9P          | B               | 15           | 26         |
| 1CBG          | A               | 202          | 210        |
| 1CD9          | A               | 37           | 43         |
| 1CD9          | A               | 65           | 75         |
| 1CD9          | B               | 13           | 24         |
| 1CD9          | B               | 59           | 68         |
| 1CD9          | C               | 37           | 43         |
| 1CD9          | C               | 65           | 75         |
| 1CD9          | D               | 13           | 24         |

Additional file 1: Table S3: Disulphide loops at the surface of PDB proteins.

| <b>PDB-ID</b> | <b>Chain-ID</b> | <b>Start</b> | <b>End</b> |
|---------------|-----------------|--------------|------------|
| 1CD9          | D               | 59           | 68         |
| 1CDF          | A               | 26           | 37         |
| 1CDF          | A               | 111          | 116        |
| 1CDG          | A               | 43           | 50         |
| 1CDT          | A               | 42           | 53         |
| 1CDT          | A               | 54           | 59         |
| 1CDT          | B               | 42           | 53         |
| 1CDT          | B               | 54           | 59         |
| 1CEL          | A               | 19           | 25         |
| 1CEL          | A               | 61           | 67         |
| 1CEL          | A               | 238          | 243        |
| 1CGT          | A               | 43           | 50         |
| 1CIV          | A               | 20           | 25         |
| 1CLE          | A               | 268          | 277        |
| 1CLV          | A               | 354          | 360        |
| 1CMS          | A               | 47           | 52         |
| 1CMS          | A               | 207          | 211        |
| 1CN4          | A               | 28           | 38         |
| 1CN4          | B               | 28           | 38         |

Additional file 1: Table S3: Disulphide loops at the surface of PDB proteins.

| <b>PDB-ID</b> | <b>Chain-ID</b> | <b>Start</b> | <b>End</b> |
|---------------|-----------------|--------------|------------|
| 1CN4          | C               | 29           | 33         |
| 1CNS          | A               | 97           | 105        |
| 1CP7          | A               | 245          | 250        |
| 1CPB          | B               | 152          | 161        |
| 1CPB          | B               | 161          | 166        |
| 1CPJ          | A               | 63           | 67         |
| 1CPJ          | A               | 108          | 119        |
| 1CPJ          | B               | 63           | 67         |
| 1CPJ          | B               | 108          | 119        |
| 1CPO          | A               | 79           | 87         |
| 1CPY          | A               | 224          | 233        |
| 1CPY          | A               | 262          | 268        |
| 1CQE          | A               | 36           | 47         |
| 1CQE          | A               | 59           | 69         |
| 1CQE          | A               | 569          | 575        |
| 1CQE          | B               | 36           | 47         |
| 1CQE          | B               | 59           | 69         |
| 1CQE          | B               | 569          | 575        |
| 1CRL          | A               | 268          | 277        |

Additional file 1: Table S3: Disulphide loops at the surface of PDB proteins.

| <b>PDB-ID</b> | <b>Chain-ID</b> | <b>Start</b> | <b>End</b> |
|---------------|-----------------|--------------|------------|
| 1CSB          | B               | 63           | 67         |
| 1CSB          | B               | 108          | 119        |
| 1CTX          | A               | 26           | 30         |
| 1CTX          | A               | 45           | 56         |
| 1CTX          | A               | 57           | 62         |
| 1CVI          | A               | 1315         | 1319       |
| 1CVI          | B               | 2315         | 2319       |
| 1CVI          | C               | 3315         | 3319       |
| 1CVI          | D               | 4315         | 4319       |
| 1CVU          | A               | 36           | 47         |
| 1CVU          | A               | 59           | 69         |
| 1CVU          | A               | 569          | 575        |
| 1CVU          | B               | 2036         | 2047       |
| 1CVU          | B               | 2059         | 2069       |
| 1CVU          | B               | 2569         | 2575       |
| 1CVW          | H               | 22           | 27         |
| 1CVW          | L               | 91           | 102        |
| 1CYG          | A               | 40           | 47         |
| 1CZF          | A               | 329          | 334        |

Additional file 1: Table S3: Disulphide loops at the surface of PDB proteins.

| <b>PDB-ID</b> | <b>Chain-ID</b> | <b>Start</b> | <b>End</b> |
|---------------|-----------------|--------------|------------|
| 1CZF          | A               | 353          | 362        |
| 1D3E          | 3               | 211          | 216        |
| 1D3E          | 3               | 211          | 220        |
| 1D3E          | 3               | 216          | 220        |
| 1D3E          | I               | 21           | 25         |
| 1D3E          | I               | 65           | 69         |
| 1D7F          | A               | 43           | 50         |
| 1D7F          | B               | 43           | 50         |
| 1DDT          | A               | 461          | 471        |
| 1DEO          | A               | 88           | 96         |
| 1DEQ          | A               | 48           | 52         |
| 1DEQ          | A               | 164          | 168        |
| 1DEQ          | B               | 200          | 204        |
| 1DEQ          | B               | 200          | 208        |
| 1DEQ          | B               | 204          | 208        |
| 1DEQ          | B               | 208          | 218        |
| 1DEQ          | C               | 135          | 139        |
| 1DEQ          | D               | 48           | 52         |
| 1DEQ          | D               | 164          | 168        |

Additional file 1: Table S3: Disulphide loops at the surface of PDB proteins.

| <b>PDB-ID</b> | <b>Chain-ID</b> | <b>Start</b> | <b>End</b> |
|---------------|-----------------|--------------|------------|
| 1DEQ          | E               | 200          | 204        |
| 1DEQ          | E               | 200          | 208        |
| 1DEQ          | E               | 204          | 208        |
| 1DEQ          | E               | 208          | 218        |
| 1DEQ          | F               | 135          | 139        |
| 1DEU          | A               | 112          | 118        |
| 1DIX          | A               | 18           | 24         |
| 1DIX          | A               | 177          | 188        |
| 1DKL          | A               | 178          | 188        |
| 1DKL          | A               | 382          | 391        |
| 1DMT          | A               | 56           | 61         |
| 1DMT          | A               | 233          | 241        |
| 1DN2          | E               | 2            | 12         |
| 1DN2          | F               | 2            | 12         |
| 1DNQ          | A               | 166          | 175        |
| 1DNQ          | A               | 191          | 199        |
| 1DNQ          | A               | 208          | 216        |
| 1DNQ          | A               | 227          | 236        |
| 1DNQ          | A               | 305          | 309        |



Additional file 1: Table S3: Disulphide loops at the surface of PDB proteins.

| <b>PDB-ID</b> | <b>Chain-ID</b> | <b>Start</b> | <b>End</b> |
|---------------|-----------------|--------------|------------|
| 1DNR          | A               | 482          | 491        |
| 1DNR          | A               | 502          | 511        |
| 1DNR          | A               | 558          | 567        |
| 1DNR          | A               | 596          | 604        |
| 1DP4          | C               | 423          | 432        |
| 1DP5          | A               | 45           | 50         |
| 1DQB          | A               | 8            | 17         |
| 1DQB          | A               | 47           | 52         |
| 1DQB          | A               | 56           | 64         |
| 1DTZ          | A               | 170          | 181        |
| 1DTZ          | A               | 625          | 630        |
| 1DU5          | A               | 51           | 61         |
| 1DU5          | A               | 66           | 72         |
| 1DU5          | A               | 132          | 142        |
| 1DU5          | A               | 146          | 155        |
| 1DU5          | A               | 156          | 164        |
| 1DU5          | B               | 51           | 61         |
| 1DU5          | B               | 66           | 72         |
| 1DU5          | B               | 132          | 142        |

Additional file 1: Table S3: Disulphide loops at the surface of PDB proteins.

| <b>PDB-ID</b> | <b>Chain-ID</b> | <b>Start</b> | <b>End</b> |
|---------------|-----------------|--------------|------------|
| 1DU5          | B               | 146          | 155        |
| 1DU5          | B               | 156          | 164        |
| 1DV8          | A               | 153          | 164        |
| 1DW0          | A               | 89           | 97         |
| 1DWA          | M               | 206          | 214        |
| 1DX5          | I               | 351          | 360        |
| 1DX5          | I               | 390          | 395        |
| 1DX5          | I               | 399          | 407        |
| 1DX5          | I               | 427          | 437        |
| 1DX6          | A               | 254          | 265        |
| 1DXL          | A               | 45           | 50         |
| 1DXL          | B               | 45           | 50         |
| 1DYQ          | A               | 96           | 106        |
| 1DYT          | A               | 62           | 71         |
| 1DZA          | A               | 165          | 172        |
| 1E1E          | A               | 210          | 216        |
| 1E1E          | B               | 210          | 216        |
| 1E3U          | A               | 44           | 51         |
| 1E3U          | C               | 44           | 51         |

Additional file 1: Table S3: Disulphide loops at the surface of PDB proteins.

| <b>PDB-ID</b> | <b>Chain-ID</b> | <b>Start</b> | <b>End</b> |
|---------------|-----------------|--------------|------------|
| 1E5P          | A               | 38           | 42         |
| 1E87          | A               | 85           | 96         |
| 1E88          | A               | 29           | 38         |
| 1EBD          | A               | 47           | 52         |
| 1EBO          | A               | 100          | 107        |
| 1EBO          | B               | 100          | 107        |
| 1EBO          | C               | 100          | 107        |
| 1EDM          | B               | 51           | 62         |
| 1EDM          | B               | 73           | 82         |
| 1EDM          | C               | 51           | 62         |
| 1EDM          | C               | 73           | 82         |
| 1EDN          | A               | 3            | 11         |
| 1EH5          | A               | 152          | 160        |
| 1EHO          | A               | 251          | 262        |
| 1EI3          | A               | 37           | 46         |
| 1EI3          | A               | 46           | 50         |
| 1EI3          | A               | 162          | 166        |
| 1EI3          | B               | 70           | 81         |
| 1EI3          | B               | 81           | 85         |

Additional file 1: Table S3: Disulphide loops at the surface of PDB proteins.

| <b>PDB-ID</b> | <b>Chain-ID</b> | <b>Start</b> | <b>End</b> |
|---------------|-----------------|--------------|------------|
| 1EI3          | B               | 198          | 202        |
| 1EI3          | B               | 198          | 206        |
| 1EI3          | B               | 202          | 206        |
| 1EI3          | B               | 206          | 216        |
| 1EI3          | C               | 8            | 19         |
| 1EI3          | C               | 9            | 19         |
| 1EI3          | C               | 19           | 23         |
| 1EI3          | C               | 135          | 139        |
| 1EI3          | D               | 37           | 46         |
| 1EI3          | D               | 46           | 50         |
| 1EI3          | D               | 162          | 166        |
| 1EI3          | E               | 70           | 81         |
| 1EI3          | E               | 81           | 85         |
| 1EI3          | E               | 198          | 202        |
| 1EI3          | E               | 198          | 206        |
| 1EI3          | E               | 202          | 206        |
| 1EI3          | E               | 206          | 216        |
| 1EI3          | F               | 8            | 19         |
| 1EI3          | F               | 9            | 19         |

Additional file 1: Table S3: Disulphide loops at the surface of PDB proteins.

| <b>PDB-ID</b> | <b>Chain-ID</b> | <b>Start</b> | <b>End</b> |
|---------------|-----------------|--------------|------------|
| 1EI3          | F               | 19           | 23         |
| 1EI3          | F               | 135          | 139        |
| 1EIU          | A               | 25           | 31         |
| 1EN2          | A               | 35           | 39         |
| 1EN2          | A               | 82           | 86         |
| 1ENF          | A               | 82           | 92         |
| 1EO8          | B               | 144          | 148        |
| 1EPW          | A               | 436          | 445        |
| 1ERB          | A               | 120          | 129        |
| 1ES7          | B               | 240          | 244        |
| 1ES7          | B               | 302          | 307        |
| 1ES7          | D               | 740          | 744        |
| 1ES7          | D               | 802          | 807        |
| 1ESL          | A               | 122          | 133        |
| 1ETH          | A               | 4            | 10         |
| 1ETH          | A               | 91           | 102        |
| 1ETH          | A               | 286          | 297        |
| 1ETH          | A               | 300          | 305        |
| 1ETH          | B               | 17           | 28         |

Additional file 1: Table S3: Disulphide loops at the surface of PDB proteins.

| <b>PDB-ID</b> | <b>Chain-ID</b> | <b>Start</b> | <b>End</b> |
|---------------|-----------------|--------------|------------|
| 1ETH          | C               | 4            | 10         |
| 1ETH          | C               | 91           | 102        |
| 1ETH          | C               | 286          | 297        |
| 1ETH          | C               | 300          | 305        |
| 1EW2          | A               | 467          | 474        |
| 1EWK          | A               | 432          | 439        |
| 1EWK          | B               | 432          | 439        |
| 1EX2          | A               | 74           | 79         |
| 1EX2          | B               | 74           | 79         |
| 1EXP          | A               | 261          | 267        |
| 1EXT          | A               | 139          | 150        |
| 1EXT          | A               | 156          | 162        |
| 1EXT          | B               | 139          | 150        |
| 1EXT          | B               | 156          | 162        |
| 1EYL          | A               | 138          | 147        |
| 1F0N          | A               | 87           | 92         |
| 1F2S          | I               | 316          | 327        |
| 1F32          | A               | 48           | 59         |
| 1F34          | A               | 45           | 50         |

Additional file 1: Table S3: Disulphide loops at the surface of PDB proteins.

| <b>PDB-ID</b> | <b>Chain-ID</b> | <b>Start</b> | <b>End</b> |
|---------------|-----------------|--------------|------------|
| 1F34          | A               | 206          | 210        |
| 1F34          | B               | 48           | 59         |
| 1F42          | A               | 109          | 120        |
| 1F45          | A               | 109          | 120        |
| 1F6F          | A               | 7            | 14         |
| 1F6F          | A               | 192          | 197        |
| 1F6F          | B               | 12           | 22         |
| 1F6F          | B               | 51           | 62         |
| 1F6F          | C               | 12           | 22         |
| 1F6F          | C               | 51           | 62         |
| 1F6W          | A               | 246          | 257        |
| 1F8U          | B               | 41           | 52         |
| 1F8U          | B               | 53           | 59         |
| 1F94          | A               | 6            | 11         |
| 1F94          | A               | 56           | 61         |
| 1FAS          | A               | 41           | 52         |
| 1FAS          | A               | 53           | 59         |
| 1FEA          | A               | 51           | 56         |
| 1FEA          | B               | 51           | 56         |

Additional file 1: Table S3: Disulphide loops at the surface of PDB proteins.

| <b>PDB-ID</b> | <b>Chain-ID</b> | <b>Start</b> | <b>End</b> |
|---------------|-----------------|--------------|------------|
| 1FF4          | A               | 46           | 57         |
| 1FF4          | A               | 58           | 63         |
| 1FG9          | C               | 60           | 68         |
| 1FG9          | C               | 178          | 183        |
| 1FG9          | D               | 60           | 68         |
| 1FG9          | D               | 178          | 183        |
| 1FG9          | E               | 60           | 68         |
| 1FG9          | E               | 178          | 183        |
| 1FJR          | A               | 61           | 66         |
| 1FJR          | A               | 71           | 82         |
| 1FL7          | B               | 87           | 94         |
| 1FLC          | A               | 332          | 338        |
| 1FLC          | B               | 145          | 149        |
| 1FLC          | C               | 332          | 338        |
| 1FLC          | D               | 145          | 149        |
| 1FLC          | E               | 332          | 338        |
| 1FLC          | F               | 145          | 149        |
| 1FM5          | A               | 85           | 96         |
| 1FSI          | A               | 104          | 110        |



Additional file 1: Table S3: Disulphide loops at the surface of PDB proteins.

| <b>PDB-ID</b> | <b>Chain-ID</b> | <b>Start</b> | <b>End</b> |
|---------------|-----------------|--------------|------------|
| 1FSU          | A               | 181          | 192        |
| 1FVU          | A               | 2            | 13         |
| 1FVU          | B               | 402          | 413        |
| 1FVU          | C               | 202          | 213        |
| 1FVU          | D               | 602          | 613        |
| 1G0X          | A               | 134          | 144        |
| 1G13          | A               | 68           | 75         |
| 1G13          | A               | 94           | 105        |
| 1G1Q          | A               | 122          | 133        |
| 1G1Q          | A               | 144          | 153        |
| 1G1Q          | B               | 122          | 133        |
| 1G1Q          | B               | 144          | 153        |
| 1G1Q          | C               | 122          | 133        |
| 1G1Q          | C               | 144          | 153        |
| 1G1Q          | D               | 122          | 133        |
| 1G1Q          | D               | 144          | 153        |
| 1G3P          | A               | 46           | 53         |
| 1G5G          | A               | 338          | 347        |
| 1G5G          | A               | 362          | 370        |

Additional file 1: Table S3: Disulphide loops at the surface of PDB proteins.

| <b>PDB-ID</b> | <b>Chain-ID</b> | <b>Start</b> | <b>End</b> |
|---------------|-----------------|--------------|------------|
| 1G5G          | A               | 394          | 399        |
| 1G5G          | B               | 338          | 347        |
| 1G5G          | B               | 362          | 370        |
| 1G5G          | B               | 394          | 399        |
| 1G5G          | C               | 338          | 347        |
| 1G5G          | C               | 362          | 370        |
| 1G5G          | C               | 394          | 399        |
| 1G72          | B               | 6            | 12         |
| 1G72          | D               | 6            | 12         |
| 1G8T          | A               | 9            | 13         |
| 1G8T          | B               | 9            | 13         |
| 1G96          | A               | 73           | 83         |
| 1G9I          | I               | 303          | 307        |
| 1G9I          | I               | 309          | 317        |
| 1G9M          | G               | 228          | 239        |
| 1G9N          | G               | 228          | 239        |
| 1GBS          | A               | 18           | 29         |
| 1GCY          | A               | 140          | 150        |
| 1GER          | A               | 42           | 47         |

Additional file 1: Table S3: Disulphide loops at the surface of PDB proteins.

| <b>PDB-ID</b> | <b>Chain-ID</b> | <b>Start</b> | <b>End</b> |
|---------------|-----------------|--------------|------------|
| 1GER          | B               | 42           | 47         |
| 1GF2          | A               | 46           | 51         |
| 1GH7          | A               | 11           | 21         |
| 1GH7          | A               | 62           | 67         |
| 1GH7          | A               | 226          | 236        |
| 1GH7          | B               | 11           | 21         |
| 1GH7          | B               | 62           | 67         |
| 1GH7          | B               | 226          | 236        |
| 1GK8          | A               | 449          | 459        |
| 1GK8          | C               | 449          | 459        |
| 1GK8          | G               | 449          | 459        |
| 1GL0          | I               | 17           | 27         |
| 1GL1          | I               | 17           | 28         |
| 1GL4          | A               | 384          | 395        |
| 1GML          | A               | 366          | 372        |
| 1GML          | D               | 366          | 372        |
| 1GMY          | A               | 63           | 67         |
| 1GMY          | A               | 108          | 119        |
| 1GMZ          | A               | 75           | 86         |

Additional file 1: Table S3: Disulphide loops at the surface of PDB proteins.

| <b>PDB-ID</b> | <b>Chain-ID</b> | <b>Start</b> | <b>End</b> |
|---------------|-----------------|--------------|------------|
| 1GOF          | A               | 18           | 27         |
| 1GOK          | A               | 255          | 261        |
| 1GPL          | A               | 4            | 10         |
| 1GPL          | A               | 90           | 101        |
| 1GPL          | A               | 285          | 296        |
| 1GPL          | A               | 299          | 304        |
| 1GPQ          | A               | 57           | 62         |
| 1GPQ          | B               | 57           | 62         |
| 1GQV          | A               | 62           | 71         |
| 1GW0          | A               | 4            | 12         |
| 1GZ2          | A               | 5            | 16         |
| 1GZ7          | A               | 268          | 277        |
| 1H0J          | A               | 42           | 53         |
| 1H0J          | A               | 54           | 59         |
| 1H34          | A               | 24           | 32         |
| 1H34          | A               | 42           | 49         |
| 1H34          | A               | 51           | 59         |
| 1H4I          | B               | 6            | 12         |
| 1H4I          | D               | 6            | 12         |

Additional file 1: Table S3: Disulphide loops at the surface of PDB proteins.

| <b>PDB-ID</b> | <b>Chain-ID</b> | <b>Start</b> | <b>End</b> |
|---------------|-----------------|--------------|------------|
| 1H6V          | A               | 59           | 64         |
| 1H76          | A               | 170          | 181        |
| 1H76          | A               | 624          | 629        |
| 1H9H          | E               | 128          | 136        |
| 1HA0          | A               | 473          | 477        |
| 1HAQ          | A               | 62           | 67         |
| 1HAQ          | A               | 123          | 128        |
| 1HAQ          | A               | 187          | 192        |
| 1HAQ          | A               | 233          | 244        |
| 1HAQ          | A               | 244          | 249        |
| 1HAQ          | A               | 291          | 302        |
| 1HAQ          | A               | 302          | 307        |
| 1HAQ          | A               | 356          | 367        |
| 1HAQ          | A               | 367          | 371        |
| 1HAQ          | A               | 413          | 424        |
| 1HAQ          | A               | 424          | 430        |
| 1HAQ          | A               | 476          | 487        |
| 1HAQ          | A               | 487          | 491        |
| 1HAQ          | A               | 535          | 546        |

Additional file 1: Table S3: Disulphide loops at the surface of PDB proteins.

| <b>PDB-ID</b> | <b>Chain-ID</b> | <b>Start</b> | <b>End</b> |
|---------------|-----------------|--------------|------------|
| 1HAQ          | A               | 546          | 551        |
| 1HAQ          | A               | 605          | 612        |
| 1HAQ          | A               | 655          | 666        |
| 1HAQ          | A               | 666          | 673        |
| 1HAQ          | A               | 715          | 726        |
| 1HAQ          | A               | 726          | 735        |
| 1HAQ          | A               | 763          | 774        |
| 1HAQ          | A               | 774          | 785        |
| 1HAQ          | A               | 785          | 793        |
| 1HAQ          | A               | 835          | 846        |
| 1HAQ          | A               | 846          | 852        |
| 1HAQ          | A               | 897          | 908        |
| 1HAQ          | A               | 908          | 913        |
| 1HAQ          | A               | 955          | 966        |
| 1HAQ          | A               | 966          | 971        |
| 1HAQ          | A               | 1014         | 1025       |
| 1HAQ          | A               | 1025         | 1030       |
| 1HAQ          | A               | 1073         | 1084       |
| 1HAQ          | A               | 1084         | 1091       |

Additional file 1: Table S3: Disulphide loops at the surface of PDB proteins.

| <b>PDB-ID</b> | <b>Chain-ID</b> | <b>Start</b> | <b>End</b> |
|---------------|-----------------|--------------|------------|
| 1HAQ          | A               | 1134         | 1145       |
| 1HAQ          | A               | 1145         | 1149       |
| 1HAQ          | A               | 1200         | 1210       |
| 1HC1          | A               | 93           | 98         |
| 1HC1          | B               | 93           | 98         |
| 1HC1          | C               | 93           | 98         |
| 1HC1          | D               | 93           | 98         |
| 1HC1          | E               | 93           | 98         |
| 1HC1          | F               | 93           | 98         |
| 1HC9          | A               | 29           | 33         |
| 1HC9          | A               | 48           | 59         |
| 1HC9          | A               | 60           | 65         |
| 1HCN          | B               | 93           | 100        |
| 1HDM          | B               | 25           | 35         |
| 1HG8          | A               | 340          | 345        |
| 1HG8          | A               | 364          | 371        |
| 1HGD          | B               | 144          | 148        |
| 1HGD          | D               | 144          | 148        |
| 1HGD          | F               | 144          | 148        |

Additional file 1: Table S3: Disulphide loops at the surface of PDB proteins.

| <b>PDB-ID</b> | <b>Chain-ID</b> | <b>Start</b> | <b>End</b> |
|---------------|-----------------|--------------|------------|
| 1HIA          | I               | 6            | 17         |
| 1HIA          | I               | 11           | 22         |
| 1HKF          | A               | 37           | 45         |
| 1HLG          | A               | 227          | 236        |
| 1HLG          | B               | 227          | 236        |
| 1HM4          | A               | 128          | 136        |
| 1HMC          | A               | 139          | 146        |
| 1HMC          | B               | 139          | 146        |
| 1HPB          | P               | 38           | 45         |
| 1HPL          | A               | 4            | 10         |
| 1HPL          | A               | 90           | 101        |
| 1HPL          | A               | 285          | 296        |
| 1HPL          | A               | 299          | 304        |
| 1HQ8          | A               | 112          | 121        |
| 1HQ8          | A               | 115          | 126        |
| 1HSL          | A               | 38           | 45         |
| 1HSL          | B               | 38           | 45         |
| 1HTN          | A               | 50           | 60         |
| 1HVQ          | A               | 50           | 57         |



Additional file 1: Table S3: Disulphide loops at the surface of PDB proteins.

| <b>PDB-ID</b> | <b>Chain-ID</b> | <b>Start</b> | <b>End</b> |
|---------------|-----------------|--------------|------------|
| 1HYR          | A               | 96           | 105        |
| 1HYR          | A               | 99           | 110        |
| 1HYR          | B               | 96           | 105        |
| 1HYR          | B               | 99           | 110        |
| 1HYR          | C               | 36           | 41         |
| 1I1R          | A               | 112          | 122        |
| 1I1R          | A               | 150          | 160        |
| 1I1R          | B               | 31           | 37         |
| 1I1R          | B               | 60           | 70         |
| 1I8N          | A               | 75           | 84         |
| 1I9W          | A               | 62           | 68         |
| 1I9W          | A               | 63           | 68         |
| 1I9W          | A               | 68           | 78         |
| 1I9W          | A               | 301          | 306        |
| 1I9W          | A               | 370          | 376        |
| 1I9W          | A               | 370          | 380        |
| 1I9W          | A               | 376          | 380        |
| 1IA5          | A               | 306          | 311        |
| 1IA5          | A               | 330          | 339        |

Additional file 1: Table S3: Disulphide loops at the surface of PDB proteins.

| <b>PDB-ID</b> | <b>Chain-ID</b> | <b>Start</b> | <b>End</b> |
|---------------|-----------------|--------------|------------|
| 1IAG          | A               | 157          | 164        |
| 1IAR          | B               | 9            | 19         |
| 1ICF          | I               | 227          | 234        |
| 1IDJ          | A               | 302          | 310        |
| 1IGA          | A               | 199          | 207        |
| 1IGA          | A               | 304          | 314        |
| 1IGA          | B               | 199          | 207        |
| 1IGA          | B               | 304          | 314        |
| 1IGR          | A               | 185          | 194        |
| 1IGR          | A               | 189          | 200        |
| 1IGR          | A               | 201          | 209        |
| 1IGR          | A               | 221          | 230        |
| 1IGR          | A               | 294          | 298        |
| 1IHP          | A               | 8            | 17         |
| 1IHP          | A               | 413          | 421        |
| 1IIU          | A               | 120          | 129        |
| 1IJL          | A               | 75           | 86         |
| 1IJL          | B               | 75           | 86         |
| 1IKP          | A               | 11           | 15         |

Additional file 1: Table S3: Disulphide loops at the surface of PDB proteins.

| <b>PDB-ID</b> | <b>Chain-ID</b> | <b>Start</b> | <b>End</b> |
|---------------|-----------------|--------------|------------|
| 1IKP          | A               | 372          | 379        |
| 1ILL          | G               | 6            | 16         |
| 1ILL          | R               | 4            | 14         |
| 1ILM          | B               | 10           | 20         |
| 1ILM          | G               | 6            | 16         |
| 1ING          | A               | 124          | 129        |
| 1ING          | A               | 232          | 237        |
| 1ING          | A               | 280          | 289        |
| 1ING          | B               | 124          | 129        |
| 1ING          | B               | 232          | 237        |
| 1ING          | B               | 280          | 289        |
| 1IOD          | A               | 2            | 13         |
| 1IOD          | B               | 202          | 213        |
| 1IOD          | G               | 417          | 422        |
| 1IOO          | A               | 16           | 21         |
| 1IOO          | A               | 169          | 180        |
| 1IQ9          | A               | 42           | 53         |
| 1IQ9          | A               | 54           | 59         |
| 1IQQ          | A               | 15           | 22         |

Additional file 1: Table S3: Disulphide loops at the surface of PDB proteins.

| <b>PDB-ID</b> | <b>Chain-ID</b> | <b>Start</b> | <b>End</b> |
|---------------|-----------------|--------------|------------|
| 1IQQ          | A               | 170          | 181        |
| 1ISF          | A               | 239          | 248        |
| 1ISF          | B               | 239          | 248        |
| 1ITO          | A               | 63           | 67         |
| 1ITO          | A               | 108          | 119        |
| 1IVO          | A               | 166          | 175        |
| 1IVO          | A               | 191          | 199        |
| 1IVO          | A               | 208          | 216        |
| 1IVO          | A               | 227          | 236        |
| 1IVO          | A               | 305          | 309        |
| 1IVO          | A               | 482          | 491        |
| 1IVO          | A               | 502          | 511        |
| 1IVO          | B               | 166          | 175        |
| 1IVO          | B               | 191          | 199        |
| 1IVO          | B               | 208          | 216        |
| 1IVO          | B               | 227          | 236        |
| 1IVO          | B               | 305          | 309        |
| 1IVO          | B               | 482          | 491        |
| 1IVO          | B               | 502          | 511        |

Additional file 1: Table S3: Disulphide loops at the surface of PDB proteins.

| <b>PDB-ID</b> | <b>Chain-ID</b> | <b>Start</b> | <b>End</b> |
|---------------|-----------------|--------------|------------|
| 1IVO          | C               | 33           | 42         |
| 1IVO          | D               | 33           | 42         |
| 1IVY          | A               | 213          | 218        |
| 1IVY          | B               | 213          | 218        |
| 1IXX          | A               | 2            | 13         |
| 1IXX          | B               | 2            | 13         |
| 1IXX          | C               | 2            | 13         |
| 1IXX          | D               | 2            | 13         |
| 1IXX          | E               | 2            | 13         |
| 1IXX          | F               | 2            | 13         |
| 1J2E          | A               | 328          | 339        |
| 1J2E          | A               | 385          | 394        |
| 1J2E          | B               | 328          | 339        |
| 1J2E          | B               | 385          | 394        |
| 1J2L          | A               | 6            | 14         |
| 1J2L          | A               | 27           | 33         |
| 1J34          | A               | 2            | 13         |
| 1J34          | B               | 202          | 213        |
| 1J34          | C               | 418          | 423        |

Additional file 1: Table S3: Disulphide loops at the surface of PDB proteins.

| <b>PDB-ID</b> | <b>Chain-ID</b> | <b>Start</b> | <b>End</b> |
|---------------|-----------------|--------------|------------|
| 1J36          | A               | 133          | 141        |
| 1J78          | A               | 95           | 106        |
| 1J78          | A               | 173          | 182        |
| 1J78          | A               | 249          | 257        |
| 1J78          | A               | 359          | 368        |
| 1J78          | A               | 436          | 446        |
| 1J8J          | A               | 47           | 52         |
| 1JBL          | A               | 3            | 11         |
| 1JEH          | A               | 44           | 49         |
| 1JEH          | B               | 44           | 49         |
| 1JHN          | A               | 361          | 367        |
| 1JK4          | A               | 28           | 34         |
| 1JK4          | A               | 74           | 79         |
| 1JK4          | B               | 1            | 6          |
| 1JMA          | A               | 118          | 127        |
| 1JMA          | B               | 4            | 15         |
| 1JMA          | B               | 89           | 97         |
| 1JNF          | A               | 171          | 177        |
| 1JNF          | A               | 494          | 503        |

Additional file 1: Table S3: Disulphide loops at the surface of PDB proteins.

| <b>PDB-ID</b> | <b>Chain-ID</b> | <b>Start</b> | <b>End</b> |
|---------------|-----------------|--------------|------------|
| 1JNF          | A               | 612          | 617        |
| 1JPE          | A               | 103          | 109        |
| 1JS8          | A               | 2549         | 2559       |
| 1JS8          | A               | 2815         | 2821       |
| 1JV2          | A               | 59           | 67         |
| 1JV2          | A               | 461          | 472        |
| 1JV2          | A               | 596          | 602        |
| 1JV2          | A               | 874          | 879        |
| 1JV2          | B               | 177          | 184        |
| 1JV2          | B               | 536          | 544        |
| 1JV2          | B               | 542          | 547        |
| 1JV2          | B               | 549          | 558        |
| 1JV2          | B               | 575          | 586        |
| 1JV2          | B               | 588          | 598        |
| 1JW1          | A               | 170          | 181        |
| 1JW1          | A               | 625          | 630        |
| 1JWI          | A               | 4            | 15         |
| 1JWI          | B               | 4            | 15         |
| 1JX3          | A               | 169          | 176        |

Additional file 1: Table S3: Disulphide loops at the surface of PDB proteins.

| <b>PDB-ID</b> | <b>Chain-ID</b> | <b>Start</b> | <b>End</b> |
|---------------|-----------------|--------------|------------|
| 1JX5          | A               | 56           | 65         |
| 1JZN          | A               | 3            | 14         |
| 1JZN          | B               | 3            | 14         |
| 1JZN          | C               | 3            | 14         |
| 1JZN          | D               | 3            | 14         |
| 1JZN          | E               | 3            | 14         |
| 1K4Y          | A               | 273          | 284        |
| 1K7T          | A               | 35           | 40         |
| 1K7T          | A               | 78           | 83         |
| 1K7T          | A               | 121          | 126        |
| 1K7T          | A               | 164          | 169        |
| 1K7T          | B               | 35           | 40         |
| 1K7T          | B               | 78           | 83         |
| 1K7T          | B               | 121          | 126        |
| 1K7T          | B               | 164          | 169        |
| 1K8I          | B               | 24           | 34         |
| 1K8Q          | A               | 227          | 236        |
| 1K9I          | A               | 256          | 267        |
| 1K9I          | B               | 256          | 267        |



Additional file 1: Table S3: Disulphide loops at the surface of PDB proteins.

| <b>PDB-ID</b> | <b>Chain-ID</b> | <b>Start</b> | <b>End</b> |
|---------------|-----------------|--------------|------------|
| 1K9I          | C               | 256          | 267        |
| 1K9I          | D               | 256          | 267        |
| 1K9I          | E               | 256          | 267        |
| 1K9I          | F               | 256          | 267        |
| 1K9I          | G               | 256          | 267        |
| 1K9I          | H               | 256          | 267        |
| 1K9I          | I               | 256          | 267        |
| 1K9I          | J               | 256          | 267        |
| 1K9J          | A               | 268          | 279        |
| 1K9J          | B               | 268          | 279        |
| 1KBA          | A               | 27           | 31         |
| 1KBA          | A               | 59           | 64         |
| 1KBA          | B               | 27           | 31         |
| 1KBA          | B               | 59           | 64         |
| 1KCG          | A               | 96           | 105        |
| 1KCG          | A               | 99           | 110        |
| 1KCG          | B               | 96           | 105        |
| 1KCG          | B               | 99           | 110        |
| 1KGY          | A               | 105          | 115        |

Additional file 1: Table S3: Disulphide loops at the surface of PDB proteins.

| <b>PDB-ID</b> | <b>Chain-ID</b> | <b>Start</b> | <b>End</b> |
|---------------|-----------------|--------------|------------|
| 1KGY          | D               | 705          | 715        |
| 1KIG          | H               | 22           | 27         |
| 1KIG          | L               | 389          | 400        |
| 1KLA          | A               | 7            | 16         |
| 1KLA          | B               | 7            | 16         |
| 1KLO          | A               | 11           | 19         |
| 1KLO          | A               | 33           | 42         |
| 1KLO          | A               | 90           | 99         |
| 1KLO          | A               | 145          | 154        |
| 1KLX          | A               | 22           | 30         |
| 1KLX          | A               | 52           | 60         |
| 1KLX          | A               | 88           | 96         |
| 1KLX          | A               | 124          | 132        |
| 1KP6          | A               | 5            | 12         |
| 1KTB          | A               | 25           | 32         |
| 1KTZ          | B               | 38           | 44         |
| 1KTZ          | B               | 115          | 120        |
| 1KUR          | A               | 50           | 60         |
| 1KUR          | A               | 65           | 71         |

Additional file 1: Table S3: Disulphide loops at the surface of PDB proteins.

| <b>PDB-ID</b> | <b>Chain-ID</b> | <b>Start</b> | <b>End</b> |
|---------------|-----------------|--------------|------------|
| 1KUR          | A               | 126          | 136        |
| 1KUR          | A               | 140          | 149        |
| 1KUR          | A               | 150          | 158        |
| 1KWI          | A               | 85           | 96         |
| 1KWN          | A               | 56           | 66         |
| 1KWN          | A               | 71           | 77         |
| 1KWN          | A               | 134          | 145        |
| 1KWN          | A               | 149          | 158        |
| 1KWN          | A               | 159          | 164        |
| 1L9L          | A               | 34           | 45         |
| 1LAF          | E               | 38           | 45         |
| 1LBE          | A               | 239          | 248        |
| 1LBE          | B               | 239          | 248        |
| 1LCG          | A               | 109          | 114        |
| 1LCG          | A               | 272          | 276        |
| 1LCR          | A               | 170          | 175        |
| 1LCS          | A               | 133          | 139        |
| 1LGY          | A               | 235          | 244        |
| 1LH9          | A               | 127          | 134        |

Additional file 1: Table S3: Disulphide loops at the surface of PDB proteins.

| <b>PDB-ID</b> | <b>Chain-ID</b> | <b>Start</b> | <b>End</b> |
|---------------|-----------------|--------------|------------|
| 1LH9          | A               | 397          | 406        |
| 1LH9          | A               | 411          | 420        |
| 1LH9          | A               | 441          | 452        |
| 1LHA          | A               | 408          | 417        |
| 1LHA          | A               | 442          | 453        |
| 1LI1          | A               | 65           | 71         |
| 1LI1          | A               | 176          | 182        |
| 1LI1          | B               | 65           | 71         |
| 1LI1          | B               | 176          | 182        |
| 1LI1          | C               | 65           | 71         |
| 1LI1          | C               | 176          | 182        |
| 1LI1          | D               | 65           | 71         |
| 1LI1          | D               | 176          | 182        |
| 1LI1          | E               | 65           | 71         |
| 1LI1          | E               | 176          | 182        |
| 1LI1          | F               | 65           | 71         |
| 1LI1          | F               | 176          | 182        |
| 1LIT          | A               | 14           | 25         |
| 1LK1          | C               | 29           | 33         |

Additional file 1: Table S3: Disulphide loops at the surface of PDB proteins.

| <b>PDB-ID</b> | <b>Chain-ID</b> | <b>Start</b> | <b>End</b> |
|---------------|-----------------|--------------|------------|
| 1LK1          | C               | 48           | 59         |
| 1LK1          | C               | 60           | 65         |
| 1LK1          | F               | 29           | 33         |
| 1LK1          | F               | 48           | 59         |
| 1LK1          | F               | 60           | 65         |
| 1LK9          | A               | 41           | 50         |
| 1LK9          | A               | 368          | 376        |
| 1LK9          | B               | 41           | 50         |
| 1LK9          | B               | 368          | 376        |
| 1LMG          | A               | 46           | 57         |
| 1LMG          | A               | 58           | 63         |
| 1LN7          | A               | 44           | 54         |
| 1LN7          | A               | 55           | 60         |
| 1LN9          | A               | 46           | 57         |
| 1LN9          | A               | 58           | 63         |
| 1LNK          | A               | 42           | 53         |
| 1LNK          | A               | 54           | 59         |
| 1LNL          | A               | 47           | 58         |
| 1LNL          | A               | 328          | 334        |

Additional file 1: Table S3: Disulphide loops at the surface of PDB proteins.

| <b>PDB-ID</b> | <b>Chain-ID</b> | <b>Start</b> | <b>End</b> |
|---------------|-----------------|--------------|------------|
| 1LNL          | B               | 47           | 58         |
| 1LNL          | B               | 328          | 334        |
| 1LNL          | C               | 47           | 58         |
| 1LNL          | C               | 328          | 334        |
| 1LPF          | A               | 48           | 53         |
| 1LPF          | B               | 48           | 53         |
| 1LQ3          | A               | 46           | 57         |
| 1LQ3          | A               | 58           | 63         |
| 1LQV          | C               | 17           | 22         |
| 1LR7          | A               | 66           | 77         |
| 1LRW          | B               | 6            | 12         |
| 1LRW          | D               | 6            | 12         |
| 1LVL          | A               | 43           | 48         |
| 1LX1          | A               | 79           | 90         |
| 1LYA          | A               | 46           | 53         |
| 1LYA          | B               | 222          | 226        |
| 1LYA          | C               | 46           | 53         |
| 1LYA          | D               | 222          | 226        |
| 1M11          | 2               | 112          | 121        |

Additional file 1: Table S3: Disulphide loops at the surface of PDB proteins.

| <b>PDB-ID</b> | <b>Chain-ID</b> | <b>Start</b> | <b>End</b> |
|---------------|-----------------|--------------|------------|
| 1M11          | 2               | 121          | 126        |
| 1M11          | 2               | 126          | 134        |
| 1M11          | 3               | 208          | 212        |
| 1M11          | 3               | 208          | 217        |
| 1M11          | 3               | 212          | 217        |
| 1M11          | R               | 60           | 64         |
| 1M11          | R               | 124          | 129        |
| 1M11          | R               | 186          | 191        |
| 1M1V          | A               | 159          | 164        |
| 1M3D          | A               | 65           | 71         |
| 1M3D          | A               | 176          | 182        |
| 1M3D          | B               | 65           | 71         |
| 1M3D          | B               | 176          | 182        |
| 1M3D          | C               | 64           | 70         |
| 1M3D          | C               | 173          | 180        |
| 1M3D          | D               | 65           | 71         |
| 1M3D          | D               | 176          | 182        |
| 1M3D          | E               | 65           | 71         |
| 1M3D          | E               | 176          | 182        |

Additional file 1: Table S3: Disulphide loops at the surface of PDB proteins.

| <b>PDB-ID</b> | <b>Chain-ID</b> | <b>Start</b> | <b>End</b> |
|---------------|-----------------|--------------|------------|
| 1M3D          | F               | 64           | 70         |
| 1M3D          | F               | 173          | 180        |
| 1M4U          | A               | 207          | 215        |
| 1M6B          | A               | 167          | 175        |
| 1M6B          | A               | 191          | 199        |
| 1M6B          | A               | 208          | 216        |
| 1M6B          | A               | 227          | 236        |
| 1M6B          | A               | 271          | 282        |
| 1M6B          | A               | 304          | 308        |
| 1M6B          | A               | 481          | 490        |
| 1M6B          | A               | 501          | 510        |
| 1M6B          | A               | 557          | 566        |
| 1M92          | A               | 113          | 120        |
| 1MCT          | I               | 16           | 27         |
| 1MF3          | A               | 107          | 118        |
| 1MGU          | A               | 107          | 118        |
| 1MHL          | C               | 115          | 125        |
| 1MHL          | C               | 221          | 232        |
| 1MHL          | D               | 115          | 125        |



Additional file 1: Table S3: Disulphide loops at the surface of PDB proteins.

| <b>PDB-ID</b> | <b>Chain-ID</b> | <b>Start</b> | <b>End</b> |
|---------------|-----------------|--------------|------------|
| 1MHL          | D               | 221          | 232        |
| 1MN1          | A               | 341          | 348        |
| 1MNW          | A               | 62           | 66         |
| 1MO9          | A               | 82           | 87         |
| 1MO9          | B               | 82           | 87         |
| 1MOF          | A               | 86           | 93         |
| 1MOX          | A               | 166          | 175        |
| 1MOX          | A               | 191          | 199        |
| 1MOX          | A               | 208          | 216        |
| 1MOX          | A               | 227          | 236        |
| 1MOX          | A               | 305          | 309        |
| 1MOX          | A               | 482          | 491        |
| 1MOX          | B               | 166          | 175        |
| 1MOX          | B               | 191          | 199        |
| 1MOX          | B               | 208          | 216        |
| 1MOX          | B               | 227          | 236        |
| 1MOX          | B               | 305          | 309        |
| 1MOX          | B               | 482          | 491        |
| 1MOX          | C               | 34           | 43         |

Additional file 1: Table S3: Disulphide loops at the surface of PDB proteins.

| <b>PDB-ID</b> | <b>Chain-ID</b> | <b>Start</b> | <b>End</b> |
|---------------|-----------------|--------------|------------|
| 1MOX          | D               | 34           | 43         |
| 1MPP          | A               | 45           | 50         |
| 1MQL          | B               | 144          | 148        |
| 1MQL          | E               | 144          | 148        |
| 1MQL          | H               | 144          | 148        |
| 1MWP          | A               | 98           | 105        |
| 1MX1          | A               | 1274         | 1285       |
| 1MX1          | B               | 2274         | 2285       |
| 1MX1          | C               | 3274         | 3285       |
| 1MX1          | D               | 4274         | 4285       |
| 1MX1          | E               | 5274         | 5285       |
| 1MX1          | F               | 6274         | 6285       |
| 1N0L          | A               | 207          | 212        |
| 1N10          | A               | 1078         | 1084       |
| 1N26          | A               | 102          | 113        |
| 1N26          | A               | 146          | 157        |
| 1N4Y          | A               | 6            | 14         |
| 1N4Y          | A               | 27           | 33         |
| 1N69          | A               | 36           | 47         |

Additional file 1: Table S3: Disulphide loops at the surface of PDB proteins.

| <b>PDB-ID</b> | <b>Chain-ID</b> | <b>Start</b> | <b>End</b> |
|---------------|-----------------|--------------|------------|
| 1N69          | B               | 36           | 47         |
| 1N6G          | A               | 105          | 116        |
| 1N6G          | A               | 116          | 121        |
| 1N6G          | B               | 105          | 116        |
| 1N6G          | B               | 116          | 121        |
| 1N6G          | C               | 105          | 116        |
| 1N6G          | C               | 116          | 121        |
| 1N7D          | A               | 297          | 308        |
| 1N7D          | A               | 337          | 347        |
| 1N7Z          | A               | 142          | 153        |
| 1N7Z          | B               | 142          | 153        |
| 1N8Y          | C               | 174          | 183        |
| 1N8Y          | C               | 199          | 206        |
| 1N8Y          | C               | 203          | 214        |
| 1N8Y          | C               | 215          | 223        |
| 1N8Y          | C               | 234          | 243        |
| 1N8Y          | C               | 313          | 317        |
| 1N8Y          | C               | 490          | 499        |
| 1N8Y          | C               | 510          | 519        |

Additional file 1: Table S3: Disulphide loops at the surface of PDB proteins.

| <b>PDB-ID</b> | <b>Chain-ID</b> | <b>Start</b> | <b>End</b> |
|---------------|-----------------|--------------|------------|
| 1N8Y          | C               | 566          | 575        |
| 1N8Z          | C               | 173          | 182        |
| 1N8Z          | C               | 198          | 205        |
| 1N8Z          | C               | 202          | 213        |
| 1N8Z          | C               | 214          | 222        |
| 1N8Z          | C               | 233          | 242        |
| 1N8Z          | C               | 312          | 316        |
| 1N8Z          | C               | 489          | 498        |
| 1N8Z          | C               | 509          | 518        |
| 1N8Z          | C               | 565          | 574        |
| 1NCD          | N               | 124          | 129        |
| 1NCD          | N               | 232          | 237        |
| 1NCD          | N               | 280          | 289        |
| 1ND1          | A               | 159          | 164        |
| 1NEP          | A               | 23           | 28         |
| 1NEP          | A               | 74           | 80         |
| 1NHC          | A               | 335          | 340        |
| 1NHC          | A               | 359          | 368        |
| 1NJR          | A               | 128          | 136        |

Additional file 1: Table S3: Disulphide loops at the surface of PDB proteins.

| <b>PDB-ID</b> | <b>Chain-ID</b> | <b>Start</b> | <b>End</b> |
|---------------|-----------------|--------------|------------|
| 1NL1          | A               | 18           | 23         |
| 1NOT          | A               | 2            | 7          |
| 1NOT          | A               | 3            | 13         |
| 1NPE          | A               | 1094         | 1105       |
| 1NPE          | B               | 738          | 746        |
| 1NPE          | B               | 760          | 769        |
| 1NPE          | B               | 817          | 826        |
| 1NPE          | B               | 872          | 881        |
| 1NST          | A               | 818          | 828        |
| 1NTJ          | A               | 61           | 66         |
| 1NTJ          | A               | 123          | 128        |
| 1NTJ          | A               | 194          | 200        |
| 1NTJ          | A               | 255          | 261        |
| 1NTL          | A               | 59           | 64         |
| 1NTL          | A               | 121          | 126        |
| 1NTL          | A               | 192          | 198        |
| 1NTL          | A               | 254          | 260        |
| 1NTL          | A               | 329          | 334        |
| 1NTL          | A               | 329          | 336        |

Additional file 1: Table S3: Disulphide loops at the surface of PDB proteins.

| <b>PDB-ID</b> | <b>Chain-ID</b> | <b>Start</b> | <b>End</b> |
|---------------|-----------------|--------------|------------|
| 1NTL          | A               | 331          | 336        |
| 1NTL          | B               | 59           | 64         |
| 1NTL          | B               | 121          | 126        |
| 1NTL          | B               | 192          | 198        |
| 1NTL          | B               | 254          | 260        |
| 1NTL          | B               | 329          | 334        |
| 1NTL          | B               | 329          | 336        |
| 1NTL          | B               | 331          | 336        |
| 1NTN          | A               | 27           | 31         |
| 1NTN          | A               | 46           | 57         |
| 1NTN          | A               | 58           | 63         |
| 1NYS          | A               | 104          | 109        |
| 1NYS          | B               | 4            | 12         |
| 1NYS          | C               | 104          | 109        |
| 1O7D          | A               | 268          | 273        |
| 1O7D          | C               | 493          | 501        |
| 1O86          | A               | 152          | 158        |
| 1OB1          | C               | 7            | 18         |
| 1OB1          | C               | 30           | 41         |

Additional file 1: Table S3: Disulphide loops at the surface of PDB proteins.

| <b>PDB-ID</b> | <b>Chain-ID</b> | <b>Start</b> | <b>End</b> |
|---------------|-----------------|--------------|------------|
| 1OBR          | A               | 314          | 323        |
| 1OC0          | B               | 25           | 31         |
| 1OGQ          | A               | 34           | 43         |
| 1OGQ          | A               | 305          | 312        |
| 1OGS          | A               | 18           | 23         |
| 1OHT          | A               | 50           | 56         |
| 1OLZ          | A               | 76           | 87         |
| 1OLZ          | A               | 105          | 114        |
| 1OLZ          | B               | 76           | 87         |
| 1OLZ          | B               | 105          | 114        |
| 1ONF          | A               | 39           | 44         |
| 1ONJ          | A               | 42           | 53         |
| 1ONJ          | A               | 54           | 59         |
| 1OO1          | A               | 78           | 89         |
| 1OQE          | K               | 9            | 20         |
| 1OQE          | L               | 9            | 20         |
| 1OQE          | M               | 9            | 20         |
| 1OQE          | N               | 9            | 20         |
| 1OQE          | O               | 9            | 20         |

Additional file 1: Table S3: Disulphide loops at the surface of PDB proteins.

| <b>PDB-ID</b> | <b>Chain-ID</b> | <b>Start</b> | <b>End</b> |
|---------------|-----------------|--------------|------------|
| 1OQE          | P               | 9            | 20         |
| 1OQE          | Q               | 9            | 20         |
| 1OQE          | R               | 9            | 20         |
| 1ORL          | A               | 16           | 26         |
| 1ORV          | A               | 385          | 394        |
| 1ORV          | B               | 385          | 394        |
| 1ORV          | C               | 385          | 394        |
| 1ORV          | D               | 385          | 394        |
| 1OUV          | A               | 56           | 64         |
| 1OUV          | A               | 92           | 100        |
| 1OUV          | A               | 128          | 136        |
| 1OUV          | A               | 164          | 172        |
| 1OUV          | A               | 200          | 208        |
| 1OUV          | A               | 236          | 244        |
| 1OUV          | A               | 272          | 280        |
| 1OVW          | B               | 18           | 24         |
| 1OVW          | B               | 60           | 66         |
| 1OVW          | B               | 223          | 228        |
| 1OZ7          | A               | 2            | 13         |



Additional file 1: Table S3: Disulphide loops at the surface of PDB proteins.

| <b>PDB-ID</b> | <b>Chain-ID</b> | <b>Start</b> | <b>End</b> |
|---------------|-----------------|--------------|------------|
| 1OZ7          | B               | 2            | 13         |
| 1OZN          | A               | 27           | 33         |
| 1P3Z          | A               | 174          | 182        |
| 1P49          | A               | 141          | 148        |
| 1P49          | A               | 481          | 487        |
| 1P49          | A               | 562          | 570        |
| 1P49          | A               | 563          | 572        |
| 1P4L          | D               | 145          | 150        |
| 1P58          | A               | 105          | 116        |
| 1P58          | A               | 116          | 121        |
| 1P58          | B               | 105          | 116        |
| 1P58          | B               | 116          | 121        |
| 1P58          | C               | 105          | 116        |
| 1P58          | C               | 116          | 121        |
| 1P9G          | A               | 35           | 39         |
| 1PA2          | A               | 44           | 49         |
| 1PB2          | A               | 18           | 29         |
| 1PBI          | A               | 14           | 22         |
| 1PBI          | A               | 32           | 39         |

Additional file 1: Table S3: Disulphide loops at the surface of PDB proteins.

| <b>PDB-ID</b> | <b>Chain-ID</b> | <b>Start</b> | <b>End</b> |
|---------------|-----------------|--------------|------------|
| 1PBI          | A               | 41           | 49         |
| 1PBI          | B               | 14           | 22         |
| 1PBI          | B               | 32           | 39         |
| 1PBI          | B               | 41           | 49         |
| 1PCV          | A               | 51           | 61         |
| 1PCV          | A               | 66           | 72         |
| 1PCV          | A               | 133          | 143        |
| 1PCV          | A               | 147          | 156        |
| 1PCV          | A               | 157          | 162        |
| 1PEN          | A               | 2            | 8          |
| 1PFX          | L               | 18           | 23         |
| 1PFX          | L               | 51           | 62         |
| 1PFX          | L               | 73           | 82         |
| 1PFX          | L               | 88           | 99         |
| 1PGS          | A               | 51           | 56         |
| 1PGS          | A               | 204          | 208        |
| 1PI2          | A               | 13           | 21         |
| 1PI2          | A               | 30           | 37         |
| 1PI2          | A               | 39           | 47         |

Additional file 1: Table S3: Disulphide loops at the surface of PDB proteins.

| <b>PDB-ID</b> | <b>Chain-ID</b> | <b>Start</b> | <b>End</b> |
|---------------|-----------------|--------------|------------|
| 1PJA          | A               | 109          | 117        |
| 1PJA          | A               | 165          | 176        |
| 1POC          | A               | 105          | 113        |
| 1PRE          | A               | 159          | 164        |
| 1PRE          | B               | 159          | 164        |
| 1PU4          | A               | 734          | 741        |
| 1PU4          | B               | 734          | 741        |
| 1PVH          | A               | 112          | 122        |
| 1PVH          | A               | 150          | 160        |
| 1PXZ          | A               | 285          | 291        |
| 1Q47          | A               | 103          | 114        |
| 1Q47          | A               | 132          | 141        |
| 1Q47          | B               | 103          | 114        |
| 1Q8D          | A               | 250          | 256        |
| 1Q8D          | A               | 315          | 325        |
| 1Q8H          | A               | 23           | 29         |
| 1QCX          | A               | 303          | 311        |
| 1QDM          | A               | 49           | 55         |
| 1QDM          | A               | 214          | 218        |

Additional file 1: Table S3: Disulphide loops at the surface of PDB proteins.

| <b>PDB-ID</b> | <b>Chain-ID</b> | <b>Start</b> | <b>End</b> |
|---------------|-----------------|--------------|------------|
| 1QFX          | A               | 394          | 402        |
| 1QFX          | B               | 394          | 402        |
| 1QHU          | A               | 126          | 131        |
| 1QI9          | A               | 77           | 86         |
| 1QI9          | A               | 544          | 555        |
| 1QI9          | B               | 77           | 86         |
| 1QI9          | B               | 544          | 555        |
| 1QKD          | A               | 43           | 54         |
| 1QKD          | A               | 55           | 60         |
| 1QKD          | B               | 43           | 54         |
| 1QKD          | B               | 55           | 60         |
| 1QLL          | A               | 75           | 86         |
| 1QLL          | B               | 75           | 86         |
| 1QO3          | C               | 145          | 150        |
| 1QO3          | D               | 145          | 150        |
| 1QWO          | A               | 8            | 17         |
| 1QWO          | A               | 413          | 421        |
| 1R2M          | A               | 53           | 64         |
| 1R42          | A               | 133          | 141        |

Additional file 1: Table S3: Disulphide loops at the surface of PDB proteins.

| <b>PDB-ID</b> | <b>Chain-ID</b> | <b>Start</b> | <b>End</b> |
|---------------|-----------------|--------------|------------|
| 1R46          | A               | 56           | 63         |
| 1R46          | A               | 378          | 382        |
| 1R46          | B               | 56           | 63         |
| 1R46          | B               | 378          | 382        |
| 1R54          | A               | 361          | 371        |
| 1R8N          | A               | 139          | 147        |
| 1R9L          | A               | 136          | 142        |
| 1RC9          | A               | 167          | 174        |
| 1RC9          | A               | 170          | 179        |
| 1RD8          | B               | 144          | 148        |
| 1RD8          | D               | 144          | 148        |
| 1RD8          | F               | 144          | 148        |
| 1RDS          | A               | 3            | 11         |
| 1RFN          | B               | 88           | 99         |
| 1RLX          | A               | 6            | 11         |
| 1RMG          | A               | 322          | 328        |
| 1RMG          | A               | 350          | 359        |
| 1RMR          | A               | 20           | 26         |
| 1RN7          | A               | 75           | 85         |

Additional file 1: Table S3: Disulphide loops at the surface of PDB proteins.

| <b>PDB-ID</b> | <b>Chain-ID</b> | <b>Start</b> | <b>End</b> |
|---------------|-----------------|--------------|------------|
| 1RNF          | A               | 64           | 71         |
| 1RP1          | A               | 4            | 10         |
| 1RP1          | A               | 90           | 101        |
| 1RP1          | A               | 285          | 296        |
| 1RP1          | A               | 299          | 304        |
| 1RP4          | A               | 100          | 105        |
| 1RPA          | A               | 315          | 319        |
| 1RRA          | A               | 65           | 72         |
| 1RUY          | I               | 644          | 648        |
| 1RUY          | K               | 644          | 648        |
| 1RUY          | M               | 644          | 648        |
| 1S2B          | A               | 141          | 148        |
| 1S2B          | A               | 194          | 203        |
| 1S2J          | A               | 48           | 54         |
| 1S4Y          | A               | 82           | 87         |
| 1S4Y          | B               | 4            | 12         |
| 1S4Y          | C               | 82           | 87         |
| 1S4Y          | D               | 4            | 12         |
| 1S78          | A               | 173          | 182        |

Additional file 1: Table S3: Disulphide loops at the surface of PDB proteins.

| <b>PDB-ID</b> | <b>Chain-ID</b> | <b>Start</b> | <b>End</b> |
|---------------|-----------------|--------------|------------|
| 1S78          | A               | 198          | 205        |
| 1S78          | A               | 202          | 213        |
| 1S78          | A               | 214          | 222        |
| 1S78          | A               | 233          | 242        |
| 1S78          | A               | 312          | 316        |
| 1S78          | A               | 489          | 498        |
| 1S78          | A               | 509          | 518        |
| 1S8M          | A               | 410          | 417        |
| 1SB2          | A               | 2            | 13         |
| 1SB2          | B               | 4            | 15         |
| 1SCH          | B               | 44           | 49         |
| 1SFR          | A               | 87           | 92         |
| 1SG1          | X               | 4            | 15         |
| 1SHW          | B               | 305          | 315        |
| 1SHY          | B               | 95           | 101        |
| 1SHY          | B               | 133          | 141        |
| 1SHY          | B               | 541          | 551        |
| 1SK3          | A               | 214          | 220        |
| 1SKZ          | A               | 8            | 19         |

Additional file 1: Table S3: Disulphide loops at the surface of PDB proteins.

| <b>PDB-ID</b> | <b>Chain-ID</b> | <b>Start</b> | <b>End</b> |
|---------------|-----------------|--------------|------------|
| 1SKZ          | A               | 62           | 73         |
| 1SMR          | A               | 45           | 50         |
| 1SMR          | A               | 206          | 210        |
| 1T0P          | A               | 287          | 294        |
| 1T2Z          | A               | 95           | 105        |
| 1T7H          | A               | 5            | 13         |
| 1T7H          | B               | 5            | 13         |
| 1TA3          | B               | 254          | 260        |
| 1TAB          | I               | 24           | 32         |
| 1TBI          | A               | 68           | 73         |
| 1TEJ          | A               | 20           | 26         |
| 1TEJ          | B               | 20           | 26         |
| 1TFG          | A               | 7            | 16         |
| 1TGL          | A               | 29           | 40         |
| 1TGL          | A               | 235          | 244        |
| 1TIA          | A               | 36           | 41         |
| 1TIC          | A               | 29           | 40         |
| 1TIC          | A               | 235          | 244        |
| 1TIE          | A               | 132          | 139        |



Additional file 1: Table S3: Disulphide loops at the surface of PDB proteins.

| <b>PDB-ID</b> | <b>Chain-ID</b> | <b>Start</b> | <b>End</b> |
|---------------|-----------------|--------------|------------|
| 1TZP          | A               | 216          | 223        |
| 1TZP          | B               | 216          | 223        |
| 1U0O          | A               | 2            | 13         |
| 1U0O          | B               | 202          | 213        |
| 1U79          | A               | 106          | 111        |
| 1UG4          | A               | 42           | 53         |
| 1UG4          | A               | 54           | 59         |
| 1UHA          | A               | 36           | 40         |
| 1UHA          | A               | 77           | 81         |
| 1UKM          | A               | 4            | 15         |
| 1UKM          | B               | 1            | 12         |
| 1ULK          | A               | 36           | 40         |
| 1ULK          | A               | 77           | 81         |
| 1ULK          | A               | 118          | 122        |
| 1ULK          | B               | 236          | 240        |
| 1ULK          | B               | 277          | 281        |
| 1ULK          | B               | 318          | 322        |
| 1UMR          | A               | 4            | 15         |
| 1UMR          | C               | 204          | 215        |

Additional file 1: Table S3: Disulphide loops at the surface of PDB proteins.

| <b>PDB-ID</b> | <b>Chain-ID</b> | <b>Start</b> | <b>End</b> |
|---------------|-----------------|--------------|------------|
| 1USW          | A               | 227          | 234        |
| 1UUZ          | A               | 59           | 64         |
| 1UV0          | A               | 14           | 25         |
| 1UV9          | A               | 473          | 484        |
| 1UV9          | A               | 602          | 608        |
| 1UZJ          | A               | 1491         | 1502       |
| 1V0X          | A               | 21           | 32         |
| 1V0X          | A               | 44           | 54         |
| 1V0X          | A               | 555          | 561        |
| 1V0Z          | A               | 130          | 135        |
| 1V0Z          | A               | 239          | 244        |
| 1V0Z          | A               | 287          | 296        |
| 1V0Z          | B               | 130          | 135        |
| 1V0Z          | B               | 239          | 244        |
| 1V0Z          | B               | 287          | 296        |
| 1V0Z          | C               | 130          | 135        |
| 1V0Z          | C               | 239          | 244        |
| 1V0Z          | C               | 287          | 296        |
| 1V0Z          | D               | 130          | 135        |

Additional file 1: Table S3: Disulphide loops at the surface of PDB proteins.

| <b>PDB-ID</b> | <b>Chain-ID</b> | <b>Start</b> | <b>End</b> |
|---------------|-----------------|--------------|------------|
| 1V0Z          | D               | 239          | 244        |
| 1V0Z          | D               | 287          | 296        |
| 1V4L          | A               | 4            | 15         |
| 1V4L          | B               | 204          | 215        |
| 1V4L          | C               | 4            | 15         |
| 1V4L          | D               | 204          | 215        |
| 1V4L          | E               | 4            | 15         |
| 1V4L          | F               | 204          | 215        |
| 1VAP          | A               | 75           | 86         |
| 1VKJ          | A               | 260          | 269        |
| 1VKJ          | B               | 260          | 269        |
| 1VKJ          | C               | 260          | 269        |
| 1VYE          | A               | 23           | 33         |
| 1VYE          | A               | 26           | 33         |
| 1VYE          | A               | 33           | 39         |
| 1VYE          | A               | 39           | 46         |
| 1VYE          | A               | 64           | 68         |
| 1VZM          | A               | 17           | 23         |
| 1W0R          | A               | 5            | 16         |

Additional file 1: Table S3: Disulphide loops at the surface of PDB proteins.

| <b>PDB-ID</b> | <b>Chain-ID</b> | <b>Start</b> | <b>End</b> |
|---------------|-----------------|--------------|------------|
| 1W0R          | A               | 62           | 66         |
| 1W0R          | A               | 66           | 77         |
| 1W0R          | A               | 77           | 84         |
| 1W0R          | A               | 100          | 105        |
| 1W0R          | A               | 100          | 106        |
| 1W0R          | A               | 121          | 125        |
| 1W0R          | A               | 125          | 136        |
| 1W0R          | A               | 136          | 143        |
| 1W0R          | A               | 136          | 147        |
| 1W0R          | A               | 143          | 147        |
| 1W0R          | A               | 147          | 157        |
| 1W0R          | A               | 157          | 163        |
| 1W0R          | A               | 178          | 182        |
| 1W0R          | A               | 211          | 221        |
| 1W0R          | A               | 221          | 227        |
| 1W0R          | A               | 242          | 246        |
| 1W0R          | A               | 246          | 257        |
| 1W0R          | A               | 269          | 279        |
| 1W0R          | A               | 279          | 285        |

Additional file 1: Table S3: Disulphide loops at the surface of PDB proteins.

| <b>PDB-ID</b> | <b>Chain-ID</b> | <b>Start</b> | <b>End</b> |
|---------------|-----------------|--------------|------------|
| 1W0R          | A               | 300          | 310        |
| 1W0R          | A               | 323          | 333        |
| 1W0R          | A               | 333          | 343        |
| 1W0R          | A               | 343          | 349        |
| 1W0R          | A               | 364          | 368        |
| 1W0R          | A               | 428          | 434        |
| 1W1C          | A               | 59           | 64         |
| 1W1C          | B               | 59           | 64         |
| 1W1E          | A               | 61           | 66         |
| 1W1E          | B               | 61           | 66         |
| 1W8A          | A               | 543          | 549        |
| 1W8A          | A               | 547          | 556        |
| 1WBA          | A               | 135          | 141        |
| 1WC2          | A               | 103          | 113        |
| 1WD3          | A               | 21           | 31         |
| 1WD3          | A               | 81           | 86         |
| 1WGC          | A               | 35           | 40         |
| 1WGC          | A               | 78           | 83         |
| 1WGC          | A               | 121          | 126        |

Additional file 1: Table S3: Disulphide loops at the surface of PDB proteins.

| <b>PDB-ID</b> | <b>Chain-ID</b> | <b>Start</b> | <b>End</b> |
|---------------|-----------------|--------------|------------|
| 1WGC          | A               | 164          | 169        |
| 1WQJ          | I               | 47           | 52         |
| 1WUW          | A               | 16           | 25         |
| 1WUW          | B               | 66           | 75         |
| 1WVR          | A               | 167          | 174        |
| 1WVR          | A               | 170          | 179        |
| 1WWL          | A               | 8            | 17         |
| 1WWL          | B               | 8            | 17         |
| 1X8Z          | A               | 8            | 17         |
| 1XCD          | A               | 25           | 31         |
| 1XCD          | A               | 29           | 38         |
| 1XDT          | R               | 134          | 143        |
| 1XDT          | T               | 461          | 471        |
| 1XED          | A               | 38           | 46         |
| 1XFD          | A               | 411          | 418        |
| 1XFD          | B               | 411          | 418        |
| 1XG2          | B               | 9            | 18         |
| 1XTA          | A               | 167          | 174        |
| 1XTA          | A               | 170          | 179        |

Additional file 1: Table S3: Disulphide loops at the surface of PDB proteins.

| <b>PDB-ID</b> | <b>Chain-ID</b> | <b>Start</b> | <b>End</b> |
|---------------|-----------------|--------------|------------|
| 1XTA          | B               | 167          | 174        |
| 1XTA          | B               | 170          | 179        |
| 1XU1          | R               | 89           | 100        |
| 1XU1          | R               | 93           | 104        |
| 1XU1          | S               | 89           | 100        |
| 1XU1          | S               | 93           | 104        |
| 1XU1          | T               | 89           | 100        |
| 1XU1          | T               | 93           | 104        |
| 1XWD          | B               | 87           | 94         |
| 1XWD          | C               | 18           | 25         |
| 1XWD          | C               | 23           | 32         |
| 1XX1          | A               | 51           | 57         |
| 1XX1          | B               | 51           | 57         |
| 1Y17          | A               | 2            | 13         |
| 1Y17          | B               | 2            | 13         |
| 1Y1E          | X               | 336          | 341        |
| 1Y4M          | A               | 86           | 93         |
| 1Y4M          | B               | 86           | 93         |
| 1Y4M          | C               | 86           | 93         |

Additional file 1: Table S3: Disulphide loops at the surface of PDB proteins.

| <b>PDB-ID</b> | <b>Chain-ID</b> | <b>Start</b> | <b>End</b> |
|---------------|-----------------|--------------|------------|
| 1Y68          | A               | 46           | 57         |
| 1Y68          | A               | 58           | 63         |
| 1YCK          | A               | 46           | 52         |
| 1YCV          | A               | 38           | 49         |
| 1YCV          | A               | 50           | 55         |
| 1YG9          | A               | 45           | 50         |
| 1YG9          | A               | 237          | 245        |
| 1YO8          | A               | 553          | 564        |
| 1YO8          | A               | 577          | 588        |
| 1YO8          | A               | 680          | 691        |
| 1YO8          | A               | 707          | 715        |
| 1YPO          | A               | 144          | 155        |
| 1YPO          | B               | 144          | 155        |
| 1YPQ          | A               | 144          | 155        |
| 1YPQ          | B               | 144          | 155        |
| 1YUK          | B               | 437          | 448        |
| 1YUK          | B               | 450          | 459        |
| 1YWH          | A               | 6            | 12         |
| 1YWH          | A               | 71           | 76         |



Additional file 1: Table S3: Disulphide loops at the surface of PDB proteins.

| <b>PDB-ID</b> | <b>Chain-ID</b> | <b>Start</b> | <b>End</b> |
|---------------|-----------------|--------------|------------|
| 1YWH          | A               | 98           | 105        |
| 1YWH          | A               | 171          | 176        |
| 1YWH          | A               | 197          | 205        |
| 1YWH          | A               | 266          | 271        |
| 1YWH          | C               | 6            | 12         |
| 1YWH          | C               | 71           | 76         |
| 1YWH          | C               | 98           | 105        |
| 1YWH          | C               | 171          | 176        |
| 1YWH          | C               | 197          | 205        |
| 1YWH          | C               | 266          | 271        |
| 1YWH          | E               | 6            | 12         |
| 1YWH          | E               | 71           | 76         |
| 1YWH          | E               | 98           | 105        |
| 1YWH          | E               | 171          | 176        |
| 1YWH          | E               | 197          | 205        |
| 1YWH          | E               | 266          | 271        |
| 1YWH          | G               | 6            | 12         |
| 1YWH          | G               | 71           | 76         |
| 1YWH          | G               | 98           | 105        |

Additional file 1: Table S3: Disulphide loops at the surface of PDB proteins.

| <b>PDB-ID</b> | <b>Chain-ID</b> | <b>Start</b> | <b>End</b> |
|---------------|-----------------|--------------|------------|
| 1YWH          | G               | 171          | 176        |
| 1YWH          | G               | 197          | 205        |
| 1YWH          | G               | 266          | 271        |
| 1YWH          | I               | 6            | 12         |
| 1YWH          | I               | 71           | 76         |
| 1YWH          | I               | 98           | 105        |
| 1YWH          | I               | 171          | 176        |
| 1YWH          | I               | 197          | 205        |
| 1YWH          | I               | 266          | 271        |
| 1YWH          | K               | 6            | 12         |
| 1YWH          | K               | 71           | 76         |
| 1YWH          | K               | 98           | 105        |
| 1YWH          | K               | 171          | 176        |
| 1YWH          | K               | 197          | 205        |
| 1YWH          | K               | 266          | 271        |
| 1YWH          | M               | 6            | 12         |
| 1YWH          | M               | 71           | 76         |
| 1YWH          | M               | 98           | 105        |
| 1YWH          | M               | 171          | 176        |

Additional file 1: Table S3: Disulphide loops at the surface of PDB proteins.

| <b>PDB-ID</b> | <b>Chain-ID</b> | <b>Start</b> | <b>End</b> |
|---------------|-----------------|--------------|------------|
| 1YWH          | M               | 197          | 205        |
| 1YWH          | M               | 266          | 271        |
| 1YWH          | O               | 6            | 12         |
| 1YWH          | O               | 71           | 76         |
| 1YWH          | O               | 98           | 105        |
| 1YWH          | O               | 171          | 176        |
| 1YWH          | O               | 197          | 205        |
| 1YWH          | O               | 266          | 271        |
| 1Z1X          | A               | 20           | 26         |
| 1Z4V          | A               | 365          | 375        |
| 1Z4V          | A               | 448          | 458        |
| 1Z4V          | A               | 528          | 539        |
| 1Z68          | A               | 321          | 332        |
| 1Z68          | B               | 321          | 332        |
| 1Z6I          | A               | 390          | 396        |
| 1Z7C          | A               | 182          | 189        |
| 1Z8Y          | A               | 68           | 78         |
| 1Z8Y          | C               | 68           | 78         |
| 1Z8Y          | E               | 68           | 78         |

Additional file 1: Table S3: Disulphide loops at the surface of PDB proteins.

| <b>PDB-ID</b> | <b>Chain-ID</b> | <b>Start</b> | <b>End</b> |
|---------------|-----------------|--------------|------------|
| 1Z8Y          | G               | 68           | 78         |
| 1ZEI          | A               | 38           | 43         |
| 1ZEI          | B               | 38           | 43         |
| 1ZEI          | C               | 38           | 43         |
| 1ZEI          | D               | 38           | 43         |
| 1ZEI          | E               | 38           | 43         |
| 1ZEI          | F               | 38           | 43         |
| 1ZJS          | A               | 21           | 29         |
| 1ZJV          | A               | 11           | 22         |
| 1ZK7          | A               | 42           | 47         |
| 1ZMC          | A               | 45           | 50         |
| 1ZMC          | B               | 45           | 50         |
| 1ZOX          | A               | 36           | 44         |
| 1ZRH          | A               | 223          | 232        |
| 1ZT3          | A               | 217          | 228        |
| 1ZTM          | A               | 331          | 340        |
| 1ZTM          | A               | 355          | 363        |
| 1ZTM          | A               | 387          | 392        |
| 1ZTM          | B               | 331          | 340        |

Additional file 1: Table S3: Disulphide loops at the surface of PDB proteins.

| <b>PDB-ID</b> | <b>Chain-ID</b> | <b>Start</b> | <b>End</b> |
|---------------|-----------------|--------------|------------|
| 1ZTM          | B               | 355          | 363        |
| 1ZTM          | B               | 387          | 392        |
| 1ZTM          | C               | 331          | 340        |
| 1ZTM          | C               | 355          | 363        |
| 1ZTM          | C               | 387          | 392        |
| 2A73          | B               | 1484         | 1489       |
| 2A73          | B               | 1615         | 1624       |
| 2A8X          | A               | 41           | 46         |
| 2A8X          | B               | 41           | 46         |
| 2AAA          | A               | 30           | 38         |
| 2AGC          | A               | 68           | 75         |
| 2AGC          | A               | 94           | 105        |
| 2AHN          | A               | 57           | 67         |
| 2AHN          | A               | 72           | 79         |
| 2AHN          | A               | 160          | 169        |
| 2AHN          | A               | 170          | 180        |
| 2AHX          | A               | 164          | 172        |
| 2AHX          | A               | 188          | 196        |
| 2AHX          | A               | 205          | 213        |

Additional file 1: Table S3: Disulphide loops at the surface of PDB proteins.

| <b>PDB-ID</b> | <b>Chain-ID</b> | <b>Start</b> | <b>End</b> |
|---------------|-----------------|--------------|------------|
| 2AHX          | A               | 224          | 233        |
| 2AHX          | A               | 268          | 279        |
| 2AHX          | A               | 301          | 305        |
| 2AHX          | A               | 478          | 487        |
| 2AHX          | A               | 498          | 507        |
| 2AHX          | A               | 555          | 564        |
| 2AHX          | A               | 592          | 600        |
| 2AO7          | A               | 503          | 511        |
| 2AOZ          | A               | 75           | 86         |
| 2ARP          | A               | 4            | 12         |
| 2ARP          | F               | 66           | 77         |
| 2ARP          | F               | 139          | 150        |
| 2ASI          | A               | 51           | 57         |
| 2ATY          | A               | 63           | 72         |
| 2ATY          | A               | 154          | 159        |
| 2ATY          | A               | 154          | 161        |
| 2ATY          | A               | 156          | 161        |
| 2ATY          | B               | 63           | 72         |
| 2ATY          | B               | 154          | 159        |

Additional file 1: Table S3: Disulphide loops at the surface of PDB proteins.

| <b>PDB-ID</b> | <b>Chain-ID</b> | <b>Start</b> | <b>End</b> |
|---------------|-----------------|--------------|------------|
| 2ATY          | B               | 154          | 161        |
| 2ATY          | B               | 156          | 161        |
| 2AW2          | A               | 72           | 79         |
| 2AW2          | B               | 4            | 15         |
| 2AW2          | B               | 89           | 97         |
| 2B0U          | A               | 4            | 12         |
| 2B0U          | B               | 4            | 12         |
| 2B0U          | C               | 66           | 77         |
| 2B0U          | C               | 139          | 150        |
| 2B0U          | C               | 216          | 227        |
| 2B0U          | D               | 66           | 77         |
| 2B0U          | D               | 139          | 150        |
| 2B0U          | D               | 216          | 227        |
| 2B39          | A               | 1504         | 1509       |
| 2B39          | A               | 1635         | 1644       |
| 2B5E          | A               | 90           | 97         |
| 2B9B          | A               | 324          | 333        |
| 2B9B          | A               | 348          | 356        |
| 2B9B          | A               | 380          | 385        |

Additional file 1: Table S3: Disulphide loops at the surface of PDB proteins.

| <b>PDB-ID</b> | <b>Chain-ID</b> | <b>Start</b> | <b>End</b> |
|---------------|-----------------|--------------|------------|
| 2B9B          | B               | 324          | 333        |
| 2B9B          | B               | 348          | 356        |
| 2B9B          | B               | 380          | 385        |
| 2B9B          | C               | 324          | 333        |
| 2B9B          | C               | 348          | 356        |
| 2B9B          | C               | 380          | 385        |
| 2BBA          | A               | 97           | 107        |
| 2BO2          | A               | 5            | 15         |
| 2BPD          | A               | 119          | 130        |
| 2BPD          | B               | 119          | 130        |
| 2C6F          | A               | 128          | 136        |
| 2C6J          | A               | 29           | 36         |
| 2C6U          | A               | 102          | 113        |
| 2C9A          | A               | 27           | 36         |
| 2CAS          | A               | 490          | 494        |
| 2CH9          | A               | 99           | 110        |
| 2CKV          | Y               | 365          | 370        |
| 2CMZ          | A               | 153          | 158        |
| 2CMZ          | B               | 153          | 158        |



Additional file 1: Table S3: Disulphide loops at the surface of PDB proteins.

| <b>PDB-ID</b> | <b>Chain-ID</b> | <b>Start</b> | <b>End</b> |
|---------------|-----------------|--------------|------------|
| 2CMZ          | C               | 153          | 158        |
| 2COV          | D               | 413          | 418        |
| 2COV          | E               | 413          | 418        |
| 2COV          | F               | 413          | 418        |
| 2COV          | G               | 413          | 418        |
| 2COV          | H               | 413          | 418        |
| 2COV          | I               | 413          | 418        |
| 2CTX          | A               | 26           | 30         |
| 2CTX          | A               | 45           | 56         |
| 2CTX          | A               | 57           | 62         |
| 2D9Q          | A               | 36           | 42         |
| 2D9Q          | A               | 64           | 74         |
| 2D9Q          | B               | 108          | 119        |
| 2D9Q          | B               | 154          | 163        |
| 2DDA          | A               | 157          | 164        |
| 2DDA          | A               | 160          | 169        |
| 2DDB          | A               | 156          | 163        |
| 2DDB          | A               | 159          | 168        |
| 2DDU          | A               | 1339         | 1348       |

Additional file 1: Table S3: Disulphide loops at the surface of PDB proteins.

| <b>PDB-ID</b> | <b>Chain-ID</b> | <b>Start</b> | <b>End</b> |
|---------------|-----------------|--------------|------------|
| 2DDU          | A               | 1413         | 1423       |
| 2DDU          | A               | 1417         | 1428       |
| 2DDU          | A               | 1430         | 1441       |
| 2DKV          | A               | 67           | 71         |
| 2DKV          | A               | 184          | 192        |
| 2DRF          | B               | 279          | 289        |
| 2DSQ          | G               | 192          | 203        |
| 2DSQ          | I               | 47           | 52         |
| 2DTG          | E               | 192          | 201        |
| 2DTG          | E               | 196          | 207        |
| 2DTG          | E               | 208          | 216        |
| 2DTG          | E               | 228          | 237        |
| 2DTG          | E               | 266          | 274        |
| 2DTG          | E               | 304          | 308        |
| 2DTG          | E               | 786          | 795        |
| 2DW0          | A               | 350          | 355        |
| 2DW0          | A               | 417          | 423        |
| 2DW0          | A               | 441          | 447        |
| 2DW0          | A               | 538          | 548        |

Additional file 1: Table S3: Disulphide loops at the surface of PDB proteins.

| <b>PDB-ID</b> | <b>Chain-ID</b> | <b>Start</b> | <b>End</b> |
|---------------|-----------------|--------------|------------|
| 2DW0          | A               | 591          | 602        |
| 2DYP          | D               | 133          | 143        |
| 2DYZ          | A               | 24           | 34         |
| 2DYZ          | A               | 34           | 39         |
| 2DYZ          | A               | 83           | 88         |
| 2DYZ          | A               | 109          | 117        |
| 2E26          | A               | 2059         | 2070       |
| 2E26          | A               | 2133         | 2143       |
| 2E26          | A               | 2151         | 2160       |
| 2E26          | A               | 2482         | 2492       |
| 2E26          | A               | 2486         | 2497       |
| 2E26          | A               | 2499         | 2508       |
| 2E3X          | A               | 162          | 167        |
| 2E3X          | A               | 229          | 235        |
| 2E3X          | A               | 253          | 259        |
| 2E3X          | A               | 350          | 360        |
| 2E3X          | B               | 2            | 13         |
| 2E3X          | C               | 4            | 15         |
| 2E4U          | A               | 412          | 419        |

Additional file 1: Table S3: Disulphide loops at the surface of PDB proteins.

| <b>PDB-ID</b> | <b>Chain-ID</b> | <b>Start</b> | <b>End</b> |
|---------------|-----------------|--------------|------------|
| 2E4U          | B               | 412          | 419        |
| 2E4Z          | A               | 430          | 437        |
| 2E9W          | A               | 443          | 450        |
| 2E9W          | B               | 443          | 450        |
| 2EAV          | A               | 246          | 252        |
| 2EAV          | B               | 246          | 252        |
| 2EBO          | A               | 601          | 608        |
| 2EBO          | B               | 601          | 608        |
| 2EBO          | C               | 601          | 608        |
| 2ERO          | A               | 352          | 357        |
| 2ERO          | A               | 419          | 425        |
| 2ERO          | A               | 443          | 449        |
| 2ERO          | A               | 539          | 549        |
| 2ERO          | A               | 592          | 603        |
| 2ERO          | B               | 352          | 357        |
| 2ERO          | B               | 419          | 425        |
| 2ERO          | B               | 443          | 449        |
| 2ERO          | B               | 539          | 549        |
| 2ERO          | B               | 592          | 603        |

Additional file 1: Table S3: Disulphide loops at the surface of PDB proteins.

| <b>PDB-ID</b> | <b>Chain-ID</b> | <b>Start</b> | <b>End</b> |
|---------------|-----------------|--------------|------------|
| 2F2L          | A               | 390          | 396        |
| 2F2L          | X               | 371          | 377        |
| 2F83          | A               | 32           | 38         |
| 2F83          | A               | 122          | 128        |
| 2F83          | A               | 212          | 218        |
| 2F83          | A               | 303          | 309        |
| 2FHU          | B               | 144          | 148        |
| 2FHU          | D               | 144          | 148        |
| 2FHU          | F               | 144          | 148        |
| 2FHV          | B               | 144          | 148        |
| 2FHV          | D               | 144          | 148        |
| 2FHV          | F               | 144          | 148        |
| 2FMW          | A               | 29           | 38         |
| 2FRG          | P               | 52           | 59         |
| 2FT3          | A               | 27           | 33         |
| 2FT3          | A               | 31           | 40         |
| 2FT3          | B               | 27           | 33         |
| 2FT3          | B               | 31           | 40         |
| 2FZ6          | A               | 58           | 69         |

Additional file 1: Table S3: Disulphide loops at the surface of PDB proteins.

| <b>PDB-ID</b> | <b>Chain-ID</b> | <b>Start</b> | <b>End</b> |
|---------------|-----------------|--------------|------------|
| 2G3P          | A               | 46           | 53         |
| 2G3P          | B               | 46           | 53         |
| 2G81          | I               | 24           | 32         |
| 2G81          | I               | 42           | 49         |
| 2G81          | I               | 51           | 59         |
| 2GAK          | A               | 372          | 381        |
| 2GAK          | B               | 372          | 381        |
| 2GBC          | A               | 326          | 337        |
| 2GBC          | B               | 326          | 337        |
| 2GHN          | A               | 77           | 88         |
| 2GIY          | A               | 280          | 289        |
| 2GIY          | A               | 314          | 323        |
| 2GIY          | B               | 280          | 289        |
| 2GIY          | B               | 314          | 323        |
| 2GJ1          | A               | 115          | 125        |
| 2GJ1          | A               | 221          | 232        |
| 2GP2          | A               | 154          | 159        |
| 2GSX          | A               | 62           | 71         |
| 2GSX          | A               | 126          | 134        |

Additional file 1: Table S3: Disulphide loops at the surface of PDB proteins.

| <b>PDB-ID</b> | <b>Chain-ID</b> | <b>Start</b> | <b>End</b> |
|---------------|-----------------|--------------|------------|
| 2GSX          | A               | 190          | 195        |
| 2GSX          | A               | 251          | 256        |
| 2GSX          | A               | 322          | 331        |
| 2GSX          | A               | 386          | 390        |
| 2GSX          | A               | 446          | 451        |
| 2GSX          | A               | 502          | 507        |
| 2GSX          | A               | 573          | 582        |
| 2GSX          | A               | 637          | 642        |
| 2GSX          | A               | 694          | 699        |
| 2GSX          | A               | 759          | 768        |
| 2GSX          | A               | 823          | 831        |
| 2GSX          | A               | 887          | 892        |
| 2GUY          | A               | 30           | 38         |
| 2GY5          | A               | 211          | 220        |
| 2GY5          | A               | 224          | 233        |
| 2GY5          | A               | 242          | 251        |
| 2GY5          | A               | 255          | 264        |
| 2GY5          | A               | 268          | 274        |
| 2GY5          | A               | 280          | 287        |

Additional file 1: Table S3: Disulphide loops at the surface of PDB proteins.

| <b>PDB-ID</b> | <b>Chain-ID</b> | <b>Start</b> | <b>End</b> |
|---------------|-----------------|--------------|------------|
| 2GY5          | A               | 289          | 298        |
| 2GY5          | A               | 302          | 311        |
| 2GY5          | A               | 315          | 323        |
| 2GY5          | A               | 331          | 340        |
| 2H5F          | A               | 13           | 21         |
| 2H5F          | A               | 57           | 68         |
| 2H5F          | A               | 69           | 74         |
| 2H62          | C               | 40           | 44         |
| 2H62          | C               | 102          | 107        |
| 2H62          | D               | 86           | 91         |
| 2H7Z          | A               | 13           | 21         |
| 2H7Z          | A               | 55           | 66         |
| 2H7Z          | A               | 67           | 72         |
| 2H7Z          | B               | 13           | 21         |
| 2H7Z          | B               | 57           | 68         |
| 2H7Z          | B               | 69           | 74         |
| 2H8I          | A               | 75           | 86         |
| 2H8I          | B               | 75           | 86         |
| 2HAU          | A               | 171          | 177        |



Additional file 1: Table S3: Disulphide loops at the surface of PDB proteins.

| <b>PDB-ID</b> | <b>Chain-ID</b> | <b>Start</b> | <b>End</b> |
|---------------|-----------------|--------------|------------|
| 2HAU          | A               | 495          | 506        |
| 2HAU          | A               | 615          | 620        |
| 2HCZ          | X               | 78           | 84         |
| 2HEV          | R               | 31           | 42         |
| 2HLE          | A               | 97           | 107        |
| 2HLQ          | A               | 118          | 123        |
| 2HQM          | A               | 61           | 66         |
| 2HQM          | B               | 61           | 66         |
| 2HT5          | A               | 124          | 129        |
| 2HT5          | A               | 232          | 237        |
| 2HT5          | A               | 280          | 289        |
| 2I0W          | A               | 51           | 61         |
| 2I0W          | A               | 66           | 72         |
| 2I0W          | A               | 133          | 143        |
| 2I0W          | A               | 147          | 156        |
| 2I0W          | A               | 157          | 162        |
| 2ID5          | A               | 3            | 9          |
| 2ID5          | A               | 7            | 18         |
| 2ID5          | B               | 3            | 9          |

Additional file 1: Table S3: Disulphide loops at the surface of PDB proteins.

| <b>PDB-ID</b> | <b>Chain-ID</b> | <b>Start</b> | <b>End</b> |
|---------------|-----------------|--------------|------------|
| 2ID5          | B               | 7            | 18         |
| 2ID5          | C               | 3            | 9          |
| 2ID5          | C               | 7            | 18         |
| 2ID5          | D               | 3            | 9          |
| 2ID5          | D               | 7            | 18         |
| 2IDP          | A               | 3            | 14         |
| 2IDP          | B               | 3            | 14         |
| 2IFG          | A               | 36           | 41         |
| 2IFG          | A               | 40           | 50         |
| 2IFG          | B               | 36           | 41         |
| 2IFG          | B               | 40           | 50         |
| 2IJ6          | A               | 3            | 14         |
| 2IJ6          | B               | 3            | 14         |
| 2IL7          | A               | 35           | 46         |
| 2ILO          | A               | 3            | 14         |
| 2ILO          | B               | 3            | 14         |
| 2IMV          | A               | 2            | 13         |
| 2IMV          | B               | 2            | 13         |
| 2IMX          | A               | 3            | 14         |

Additional file 1: Table S3: Disulphide loops at the surface of PDB proteins.

| <b>PDB-ID</b> | <b>Chain-ID</b> | <b>Start</b> | <b>End</b> |
|---------------|-----------------|--------------|------------|
| 2IMX          | B               | 3            | 14         |
| 2INM          | A               | 3            | 14         |
| 2INM          | B               | 3            | 14         |
| 2INO          | A               | 3            | 14         |
| 2INO          | B               | 3            | 14         |
| 2J04          | B               | 375          | 383        |
| 2J2Z          | A               | 207          | 212        |
| 2JA4          | A               | 342          | 350        |
| 2JH1          | A               | 37           | 45         |
| 2JH1          | A               | 87           | 97         |
| 2JH1          | A               | 177          | 187        |
| 2JIH          | A               | 362          | 367        |
| 2JIH          | A               | 534          | 545        |
| 2JQP          | A               | 6            | 11         |
| 2JQP          | A               | 46           | 57         |
| 2JQP          | A               | 58           | 63         |
| 2JUQ          | A               | 2            | 8          |
| 2JUQ          | A               | 3            | 12         |
| 2JX9          | A               | 96           | 102        |

Additional file 1: Table S3: Disulphide loops at the surface of PDB proteins.

| <b>PDB-ID</b> | <b>Chain-ID</b> | <b>Start</b> | <b>End</b> |
|---------------|-----------------|--------------|------------|
| 2KGU          | A               | 10           | 21         |
| 2KGU          | A               | 23           | 30         |
| 2KL5          | A               | 88           | 92         |
| 2KUY          | A               | 12           | 21         |
| 2KVD          | A               | 40           | 51         |
| 2L03          | A               | 7            | 14         |
| 2L03          | A               | 67           | 72         |
| 2L1Q          | A               | 17           | 28         |
| 2L1Q          | A               | 23           | 33         |
| 2L3I          | A               | 4            | 10         |
| 2L3Y          | A               | 49           | 55         |
| 2L3Y          | A               | 78           | 88         |
| 2L7S          | A               | 16           | 21         |
| 2LB7          | A               | 37           | 41         |
| 2LDF          | A               | 3            | 11         |
| 2MCM          | A               | 36           | 46         |
| 2MCM          | A               | 88           | 93         |
| 2NMS          | A               | 54           | 62         |
| 2NVK          | X               | 57           | 62         |

Additional file 1: Table S3: Disulphide loops at the surface of PDB proteins.

| <b>PDB-ID</b> | <b>Chain-ID</b> | <b>Start</b> | <b>End</b> |
|---------------|-----------------|--------------|------------|
| 2NXZ          | A               | 228          | 239        |
| 2OCW          | A               | 38           | 46         |
| 2OCW          | A               | 253          | 261        |
| 2OCW          | A               | 367          | 377        |
| 2OCW          | A               | 464          | 468        |
| 2OCW          | A               | 468          | 478        |
| 2OCW          | A               | 478          | 485        |
| 2OF6          | A               | 105          | 116        |
| 2OF6          | A               | 116          | 121        |
| 2OF6          | B               | 105          | 116        |
| 2OF6          | B               | 116          | 121        |
| 2OF6          | C               | 105          | 116        |
| 2OF6          | C               | 116          | 121        |
| 2OO4          | A               | 1632         | 1639       |
| 2OR7          | A               | 32           | 43         |
| 2OR8          | A               | 31           | 42         |
| 2OTP          | A               | 132          | 142        |
| 2OTP          | B               | 132          | 142        |
| 2OX8          | A               | 607          | 618        |

Additional file 1: Table S3: Disulphide loops at the surface of PDB proteins.

| <b>PDB-ID</b> | <b>Chain-ID</b> | <b>Start</b> | <b>End</b> |
|---------------|-----------------|--------------|------------|
| 2OX9          | A               | 607          | 618        |
| 2OXE          | A               | 21           | 27         |
| 2OXE          | A               | 109          | 120        |
| 2OXE          | A               | 304          | 315        |
| 2OXE          | A               | 318          | 323        |
| 2OY3          | A               | 487          | 497        |
| 2P26          | A               | 437          | 448        |
| 2P26          | A               | 450          | 459        |
| 2P26          | A               | 484          | 495        |
| 2PE4          | A               | 358          | 369        |
| 2PE4          | A               | 420          | 429        |
| 2PLH          | A               | 16           | 25         |
| 2PM8          | A               | 252          | 263        |
| 2PM8          | B               | 252          | 263        |
| 2PPL          | A               | 21           | 27         |
| 2PPL          | A               | 109          | 120        |
| 2PPL          | A               | 303          | 314        |
| 2PPL          | A               | 317          | 322        |
| 2Q5T          | A               | 11           | 15         |

Additional file 1: Table S3: Disulphide loops at the surface of PDB proteins.

| <b>PDB-ID</b> | <b>Chain-ID</b> | <b>Start</b> | <b>End</b> |
|---------------|-----------------|--------------|------------|
| 2Q5T          | A               | 394          | 401        |
| 2Q7N          | A               | 10           | 20         |
| 2Q7N          | A               | 37           | 45         |
| 2Q7N          | A               | 293          | 303        |
| 2Q7Z          | A               | 58           | 63         |
| 2Q7Z          | A               | 120          | 125        |
| 2Q7Z          | A               | 191          | 197        |
| 2Q7Z          | A               | 252          | 256        |
| 2Q7Z          | A               | 312          | 317        |
| 2Q7Z          | A               | 375          | 380        |
| 2Q7Z          | A               | 446          | 452        |
| 2Q7Z          | A               | 508          | 513        |
| 2Q7Z          | A               | 570          | 575        |
| 2Q7Z          | A               | 641          | 647        |
| 2Q7Z          | A               | 702          | 706        |
| 2Q7Z          | A               | 762          | 767        |
| 2Q7Z          | A               | 825          | 830        |
| 2Q7Z          | A               | 896          | 902        |
| 2Q7Z          | A               | 958          | 963        |

Additional file 1: Table S3: Disulphide loops at the surface of PDB proteins.

| <b>PDB-ID</b> | <b>Chain-ID</b> | <b>Start</b> | <b>End</b> |
|---------------|-----------------|--------------|------------|
| 2Q7Z          | A               | 1020         | 1025       |
| 2Q7Z          | A               | 1091         | 1097       |
| 2Q7Z          | A               | 1152         | 1156       |
| 2Q7Z          | A               | 1212         | 1217       |
| 2Q7Z          | A               | 1275         | 1280       |
| 2Q7Z          | A               | 1346         | 1355       |
| 2Q7Z          | A               | 1411         | 1416       |
| 2Q7Z          | A               | 1473         | 1478       |
| 2Q7Z          | A               | 1544         | 1550       |
| 2Q7Z          | A               | 1605         | 1609       |
| 2Q7Z          | A               | 1665         | 1670       |
| 2Q7Z          | A               | 1728         | 1733       |
| 2Q7Z          | A               | 1799         | 1807       |
| 2Q7Z          | A               | 1863         | 1868       |
| 2Q87          | A               | 33           | 41         |
| 2Q87          | B               | 33           | 41         |
| 2Q87          | C               | 33           | 41         |
| 2QAE          | A               | 41           | 46         |
| 2QAE          | B               | 41           | 46         |



Additional file 1: Table S3: Disulphide loops at the surface of PDB proteins.

| <b>PDB-ID</b> | <b>Chain-ID</b> | <b>Start</b> | <b>End</b> |
|---------------|-----------------|--------------|------------|
| 2QBX          | A               | 105          | 115        |
| 2QC1          | A               | 29           | 33         |
| 2QC1          | A               | 48           | 59         |
| 2QC1          | A               | 60           | 65         |
| 2QJ4          | A               | 75           | 85         |
| 2QJ4          | B               | 75           | 85         |
| 2QLY          | A               | 573          | 584        |
| 2QN4          | A               | 140          | 144        |
| 2QN5          | B               | 34           | 41         |
| 2QN5          | B               | 81           | 89         |
| 2QN5          | B               | 98           | 105        |
| 2QTS          | A               | 173          | 180        |
| 2QTS          | B               | 173          | 180        |
| 2QTS          | C               | 173          | 180        |
| 2R0R          | A               | 36           | 47         |
| 2R0R          | B               | 36           | 47         |
| 2R2K          | A               | 43           | 49         |
| 2R2K          | B               | 43           | 49         |
| 2R2K          | C               | 43           | 49         |

Additional file 1: Table S3: Disulphide loops at the surface of PDB proteins.

| <b>PDB-ID</b> | <b>Chain-ID</b> | <b>Start</b> | <b>End</b> |
|---------------|-----------------|--------------|------------|
| 2R2K          | D               | 43           | 49         |
| 2R6P          | A               | 105          | 116        |
| 2R6P          | A               | 116          | 121        |
| 2R6P          | B               | 105          | 116        |
| 2R6P          | B               | 116          | 121        |
| 2R6P          | C               | 105          | 116        |
| 2R6P          | C               | 116          | 121        |
| 2RJP          | A               | 322          | 327        |
| 2RJP          | A               | 495          | 506        |
| 2RJQ          | A               | 371          | 376        |
| 2RJQ          | A               | 542          | 553        |
| 2RKQ          | A               | 48           | 54         |
| 2RQZ          | A               | 5            | 16         |
| 2RQZ          | A               | 27           | 36         |
| 2UY6          | A               | 207          | 212        |
| 2V5E          | A               | 161          | 167        |
| 2V5E          | A               | 216          | 221        |
| 2V5E          | A               | 250          | 256        |
| 2V5E          | A               | 315          | 325        |

Additional file 1: Table S3: Disulphide loops at the surface of PDB proteins.

| <b>PDB-ID</b> | <b>Chain-ID</b> | <b>Start</b> | <b>End</b> |
|---------------|-----------------|--------------|------------|
| 2V5O          | A               | 1559         | 1566       |
| 2V5O          | A               | 1706         | 1713       |
| 2V5O          | A               | 1850         | 1856       |
| 2V5O          | A               | 2039         | 2046       |
| 2V70          | A               | 506          | 512        |
| 2V70          | A               | 510          | 519        |
| 2V9S          | A               | 273          | 279        |
| 2V9S          | A               | 277          | 286        |
| 2VJ2          | A               | 187          | 196        |
| 2VJ2          | A               | 220          | 229        |
| 2VJ2          | A               | 234          | 245        |
| 2VJ2          | A               | 253          | 262        |
| 2VJ2          | A               | 265          | 276        |
| 2VJ2          | A               | 271          | 282        |
| 2VJ2          | A               | 284          | 293        |
| 2VJ2          | A               | 324          | 333        |
| 2VLW          | A               | 46           | 57         |
| 2VLW          | A               | 58           | 63         |
| 2VRP          | A               | 5            | 16         |

Additional file 1: Table S3: Disulphide loops at the surface of PDB proteins.

| <b>PDB-ID</b> | <b>Chain-ID</b> | <b>Start</b> | <b>End</b> |
|---------------|-----------------|--------------|------------|
| 2VRP          | B               | 2            | 13         |
| 2VT4          | A               | 192          | 198        |
| 2VT4          | B               | 192          | 198        |
| 2VTC          | A               | 101          | 105        |
| 2W50          | A               | 45           | 56         |
| 2W61          | A               | 419          | 424        |
| 2W86          | A               | 7            | 17         |
| 2W9O          | A               | 4            | 13         |
| 2WBA          | A               | 52           | 57         |
| 2WBA          | B               | 52           | 57         |
| 2WFH          | A               | 727          | 733        |
| 2WFH          | A               | 731          | 740        |
| 2WFH          | B               | 727          | 733        |
| 2WFH          | B               | 731          | 740        |
| 2WFT          | A               | 608          | 617        |
| 2WFT          | A               | 612          | 623        |
| 2WFT          | A               | 625          | 634        |
| 2WFT          | A               | 639          | 649        |
| 2WFT          | A               | 657          | 666        |

Additional file 1: Table S3: Disulphide loops at the surface of PDB proteins.

| <b>PDB-ID</b> | <b>Chain-ID</b> | <b>Start</b> | <b>End</b> |
|---------------|-----------------|--------------|------------|
| 2WFU          | A               | 6            | 11         |
| 2WGC          | A               | 35           | 40         |
| 2WGC          | A               | 78           | 83         |
| 2WGC          | A               | 121          | 126        |
| 2WGC          | A               | 164          | 169        |
| 2WML          | A               | 62           | 67         |
| 2WO3          | A               | 108          | 118        |
| 2WPH          | E               | 88           | 99         |
| 2WQZ          | A               | 306          | 317        |
| 2WR7          | A               | 473          | 477        |
| 2WR7          | B               | 473          | 477        |
| 2WR7          | C               | 473          | 477        |
| 2WRH          | K               | 644          | 648        |
| 2X10          | A               | 105          | 115        |
| 2X10          | A               | 262          | 273        |
| 2X11          | A               | 105          | 115        |
| 2X11          | A               | 262          | 273        |
| 2X11          | A               | 369          | 376        |
| 2X2U          | A               | 137          | 142        |

Additional file 1: Table S3: Disulphide loops at the surface of PDB proteins.

| <b>PDB-ID</b> | <b>Chain-ID</b> | <b>Start</b> | <b>End</b> |
|---------------|-----------------|--------------|------------|
| 2XJH          | A               | 4            | 9          |
| 2XOT          | A               | 34           | 40         |
| 2XOT          | A               | 38           | 47         |
| 2XOT          | B               | 34           | 40         |
| 2XOT          | B               | 38           | 47         |
| 2XR9          | A               | 79           | 85         |
| 2XR9          | A               | 123          | 129        |
| 2XR9          | A               | 774          | 784        |
| 2XRC          | A               | 25           | 36         |
| 2XRC          | A               | 30           | 41         |
| 2XRC          | A               | 168          | 178        |
| 2XWT          | C               | 24           | 29         |
| 2XWT          | C               | 31           | 41         |
| 2Y38          | A               | 305          | 314        |
| 2Y38          | A               | 329          | 338        |
| 2Y38          | A               | 334          | 342        |
| 2Y38          | A               | 364          | 373        |
| 2Y38          | A               | 401          | 410        |
| 2YD0          | A               | 736          | 743        |

Additional file 1: Table S3: Disulphide loops at the surface of PDB proteins.

| <b>PDB-ID</b> | <b>Chain-ID</b> | <b>Start</b> | <b>End</b> |
|---------------|-----------------|--------------|------------|
| 2YGO          | A               | 182          | 192        |
| 2YGO          | A               | 200          | 209        |
| 2YGQ          | A               | 182          | 192        |
| 2YGQ          | A               | 200          | 209        |
| 2YGQ          | A               | 214          | 224        |
| 2YGQ          | A               | 232          | 241        |
| 2YGQ          | A               | 246          | 256        |
| 2YGQ          | A               | 264          | 273        |
| 2YHF          | A               | 71           | 82         |
| 2YIL          | A               | 38           | 44         |
| 2YIL          | A               | 82           | 86         |
| 2YIL          | A               | 111          | 117        |
| 2YIL          | B               | 38           | 44         |
| 2YIL          | B               | 82           | 86         |
| 2YIL          | B               | 111          | 117        |
| 2Z62          | A               | 29           | 40         |
| 2Z63          | A               | 29           | 40         |
| 2Z64          | A               | 28           | 39         |
| 2Z64          | C               | 95           | 105        |

Additional file 1: Table S3: Disulphide loops at the surface of PDB proteins.

| <b>PDB-ID</b> | <b>Chain-ID</b> | <b>Start</b> | <b>End</b> |
|---------------|-----------------|--------------|------------|
| 2Z66          | A               | 24           | 30         |
| 2Z66          | A               | 28           | 37         |
| 2Z7X          | A               | 30           | 36         |
| 2Z7X          | B               | 223          | 230        |
| 2Z81          | A               | 30           | 36         |
| 3A2E          | A               | 62           | 71         |
| 3A57          | A               | 151          | 161        |
| 3A7Q          | A               | 2133         | 2143       |
| 3A7Q          | A               | 2151         | 2160       |
| 3A7Q          | A               | 2415         | 2422       |
| 3A7Q          | A               | 2482         | 2492       |
| 3A7Q          | A               | 2486         | 2497       |
| 3A7Q          | A               | 2499         | 2508       |
| 3AFC          | A               | 107          | 117        |
| 3AFC          | A               | 135          | 144        |
| 3AFC          | B               | 107          | 117        |
| 3AFC          | B               | 135          | 144        |
| 3AHQ          | A               | 37           | 46         |
| 3ALQ          | R               | 104          | 112        |



Additional file 1: Table S3: Disulphide loops at the surface of PDB proteins.

| <b>PDB-ID</b> | <b>Chain-ID</b> | <b>Start</b> | <b>End</b> |
|---------------|-----------------|--------------|------------|
| 3ALQ          | S               | 104          | 112        |
| 3ALQ          | T               | 104          | 112        |
| 3AOK          | A               | 56           | 66         |
| 3AOK          | A               | 71           | 77         |
| 3AOK          | A               | 134          | 145        |
| 3AOK          | A               | 149          | 158        |
| 3AOK          | A               | 159          | 164        |
| 3ASI          | A               | 1050         | 1061       |
| 3ASI          | A               | 1072         | 1082       |
| 3B1B          | A               | 194          | 198        |
| 3B2D          | C               | 102          | 112        |
| 3B2D          | D               | 102          | 112        |
| 3B3Q          | A               | 342          | 353        |
| 3B3Q          | B               | 342          | 353        |
| 3B4V          | A               | 4            | 12         |
| 3B4V          | B               | 4            | 12         |
| 3B4V          | C               | 73           | 84         |
| 3B4V          | C               | 145          | 156        |
| 3B4V          | D               | 73           | 84         |

Additional file 1: Table S3: Disulphide loops at the surface of PDB proteins.

| <b>PDB-ID</b> | <b>Chain-ID</b> | <b>Start</b> | <b>End</b> |
|---------------|-----------------|--------------|------------|
| 3B4V          | D               | 145          | 156        |
| 3B7E          | A               | 124          | 129        |
| 3B7E          | A               | 232          | 237        |
| 3B7E          | A               | 280          | 289        |
| 3B7E          | B               | 124          | 129        |
| 3B7E          | B               | 232          | 237        |
| 3B7E          | B               | 280          | 289        |
| 3BD9          | A               | 294          | 304        |
| 3BDW          | A               | 61           | 72         |
| 3BDW          | B               | 119          | 130        |
| 3BG4          | D               | 12           | 23         |
| 3BG4          | D               | 17           | 28         |
| 3BI9          | X               | 31           | 42         |
| 3BIW          | A               | 342          | 353        |
| 3BIW          | D               | 342          | 353        |
| 3BL8          | A               | 317          | 328        |
| 3BL8          | C               | 317          | 328        |
| 3BPN          | B               | 9            | 19         |
| 3BPN          | C               | 134          | 144        |

Additional file 1: Table S3: Disulphide loops at the surface of PDB proteins.

| <b>PDB-ID</b> | <b>Chain-ID</b> | <b>Start</b> | <b>End</b> |
|---------------|-----------------|--------------|------------|
| 3BT2          | A               | 11           | 19         |
| 3BT2          | A               | 33           | 42         |
| 3BT2          | B               | 25           | 31         |
| 3BT2          | U               | 6            | 12         |
| 3BT2          | U               | 71           | 76         |
| 3BT2          | U               | 98           | 105        |
| 3BT2          | U               | 171          | 176        |
| 3BT2          | U               | 197          | 205        |
| 3BT2          | U               | 266          | 271        |
| 3BT4          | A               | 68           | 79         |
| 3C05          | A               | 21           | 27         |
| 3C05          | B               | 21           | 27         |
| 3C9A          | D               | 84           | 93         |
| 3CAD          | A               | 145          | 150        |
| 3CFW          | A               | 122          | 133        |
| 3CFW          | A               | 144          | 153        |
| 3CIG          | A               | 28           | 37         |
| 3CJ1          | A               | 323          | 328        |
| 3CL4          | A               | 307          | 312        |

Additional file 1: Table S3: Disulphide loops at the surface of PDB proteins.

| <b>PDB-ID</b> | <b>Chain-ID</b> | <b>Start</b> | <b>End</b> |
|---------------|-----------------|--------------|------------|
| 3CQL          | A               | 97           | 105        |
| 3CU7          | A               | 1520         | 1525       |
| 3CZU          | A               | 105          | 115        |
| 3D12          | A               | 493          | 503        |
| 3D12          | A               | 565          | 574        |
| 3D12          | D               | 493          | 503        |
| 3D12          | D               | 565          | 574        |
| 3DCN          | A               | 187          | 194        |
| 3DGC          | R               | 71           | 79         |
| 3DI2          | B               | 54           | 62         |
| 3DI2          | B               | 88           | 98         |
| 3DIH          | A               | 75           | 86         |
| 3DSL          | A               | 162          | 167        |
| 3DSL          | A               | 229          | 235        |
| 3DSL          | A               | 253          | 259        |
| 3DSL          | A               | 350          | 360        |
| 3DSL          | A               | 403          | 414        |
| 3DSL          | B               | 162          | 167        |
| 3DSL          | B               | 229          | 235        |

Additional file 1: Table S3: Disulphide loops at the surface of PDB proteins.

| <b>PDB-ID</b> | <b>Chain-ID</b> | <b>Start</b> | <b>End</b> |
|---------------|-----------------|--------------|------------|
| 3DSL          | B               | 253          | 259        |
| 3DSL          | B               | 350          | 360        |
| 3DSL          | B               | 403          | 414        |
| 3E0G          | A               | 4            | 14         |
| 3E0G          | A               | 31           | 39         |
| 3E0G          | A               | 290          | 300        |
| 3ED3          | A               | 87           | 96         |
| 3EDY          | A               | 111          | 122        |
| 3EQA          | A               | 286          | 294        |
| 3ETO          | A               | 1686         | 1693       |
| 3EVS          | C               | 21           | 25         |
| 3EVS          | C               | 83           | 89         |
| 3EYJ          | B               | 144          | 148        |
| 3F6K          | A               | 415          | 425        |
| 3F8U          | A               | 85           | 92         |
| 3FBX          | A               | 147          | 157        |
| 3FBY          | A               | 255          | 266        |
| 3FBY          | A               | 282          | 287        |
| 3FF7          | C               | 75           | 86         |

Additional file 1: Table S3: Disulphide loops at the surface of PDB proteins.

| <b>PDB-ID</b> | <b>Chain-ID</b> | <b>Start</b> | <b>End</b> |
|---------------|-----------------|--------------|------------|
| 3FF7          | D               | 75           | 86         |
| 3FF8          | C               | 75           | 86         |
| 3FIQ          | A               | 44           | 48         |
| 3FKU          | B               | 144          | 148        |
| 3FKU          | D               | 144          | 148        |
| 3FKU          | F               | 144          | 148        |
| 3FKU          | X               | 104          | 109        |
| 3FKU          | Y               | 104          | 109        |
| 3FKU          | Z               | 104          | 109        |
| 3FRP          | B               | 1463         | 1468       |
| 3FRP          | B               | 1594         | 1603       |
| 3FV3          | B               | 47           | 53         |
| 3FXI          | A               | 29           | 40         |
| 3FXI          | B               | 29           | 40         |
| 3FXI          | C               | 95           | 105        |
| 3FXI          | D               | 95           | 105        |
| 3G5C          | A               | 394          | 401        |
| 3G5C          | A               | 460          | 466        |
| 3G5C          | A               | 485          | 491        |

Additional file 1: Table S3: Disulphide loops at the surface of PDB proteins.

| <b>PDB-ID</b> | <b>Chain-ID</b> | <b>Start</b> | <b>End</b> |
|---------------|-----------------|--------------|------------|
| 3G5C          | A               | 583          | 593        |
| 3G5C          | A               | 657          | 668        |
| 3G5C          | A               | 702          | 711        |
| 3G8G          | A               | 75           | 86         |
| 3G8H          | A               | 75           | 86         |
| 3G9V          | A               | 78           | 86         |
| 3GBO          | A               | 157          | 162        |
| 3GBS          | A               | 177          | 184        |
| 3GHM          | A               | 360          | 371        |
| 3GHM          | A               | 545          | 555        |
| 3GIS          | X               | 351          | 360        |
| 3GIS          | X               | 390          | 395        |
| 3GIS          | X               | 399          | 407        |
| 3GIS          | X               | 427          | 437        |
| 3GNO          | A               | 197          | 205        |
| 3GRO          | A               | 152          | 160        |
| 3GRO          | B               | 152          | 160        |
| 3H53          | A               | 42           | 49         |
| 3H53          | B               | 42           | 49         |

Additional file 1: Table S3: Disulphide loops at the surface of PDB proteins.

| <b>PDB-ID</b> | <b>Chain-ID</b> | <b>Start</b> | <b>End</b> |
|---------------|-----------------|--------------|------------|
| 3H5C          | B               | 51           | 62         |
| 3H5C          | B               | 73           | 82         |
| 3HH2          | A               | 6            | 16         |
| 3HH2          | B               | 6            | 16         |
| 3HH2          | C               | 66           | 77         |
| 3HH2          | C               | 139          | 150        |
| 3HH2          | C               | 216          | 227        |
| 3HH2          | D               | 66           | 77         |
| 3HH2          | D               | 139          | 150        |
| 3HH2          | D               | 216          | 227        |
| 3HH7          | A               | 58           | 63         |
| 3HH7          | B               | 58           | 63         |
| 3HHC          | A               | 155          | 162        |
| 3HHC          | C               | 155          | 162        |
| 3HI7          | A               | 177          | 181        |
| 3HI7          | B               | 177          | 181        |
| 3HN4          | A               | 74           | 84         |
| 3HTC          | I               | 6            | 14         |
| 3HTC          | I               | 6            | 16         |



Additional file 1: Table S3: Disulphide loops at the surface of PDB proteins.

| <b>PDB-ID</b> | <b>Chain-ID</b> | <b>Start</b> | <b>End</b> |
|---------------|-----------------|--------------|------------|
| 3HTC          | I               | 14           | 22         |
| 3HTC          | I               | 16           | 22         |
| 3HTC          | I               | 22           | 28         |
| 3HTC          | I               | 28           | 39         |
| 3IXY          | A               | 105          | 116        |
| 3IXY          | A               | 116          | 121        |
| 3IXY          | B               | 105          | 116        |
| 3IXY          | B               | 116          | 121        |
| 3IXY          | C               | 105          | 116        |
| 3IXY          | C               | 116          | 121        |
| 3IXY          | D               | 34           | 45         |
| 3IXY          | D               | 45           | 53         |
| 3IXY          | E               | 34           | 45         |
| 3IXY          | E               | 45           | 53         |
| 3IXY          | F               | 34           | 45         |
| 3IXY          | F               | 45           | 53         |
| 3IYG          | D               | 389          | 393        |
| 3IYG          | E               | 412          | 423        |
| 3IYG          | G               | 354          | 360        |

Additional file 1: Table S3: Disulphide loops at the surface of PDB proteins.

| <b>PDB-ID</b> | <b>Chain-ID</b> | <b>Start</b> | <b>End</b> |
|---------------|-----------------|--------------|------------|
| 3IYG          | H               | 355          | 361        |
| 3IYG          | Z               | 491          | 500        |
| 3J0C          | B               | 22           | 27         |
| 3J0C          | E               | 22           | 27         |
| 3J0C          | H               | 22           | 27         |
| 3J0C          | K               | 22           | 27         |
| 3JVF          | C               | 12           | 19         |
| 3JVF          | C               | 154          | 165        |
| 3JVF          | C               | 259          | 263        |
| 3JVF          | C               | 263          | 272        |
| 3K51          | B               | 115          | 126        |
| 3K6S          | A               | 50           | 57         |
| 3K6S          | A               | 476          | 487        |
| 3K6S          | A               | 752          | 758        |
| 3K6S          | A               | 1003         | 1008       |
| 3K6S          | B               | 169          | 176        |
| 3K6S          | B               | 437          | 448        |
| 3K6S          | B               | 450          | 459        |
| 3K6S          | B               | 484          | 495        |

Additional file 1: Table S3: Disulphide loops at the surface of PDB proteins.

| <b>PDB-ID</b> | <b>Chain-ID</b> | <b>Start</b> | <b>End</b> |
|---------------|-----------------|--------------|------------|
| 3K6S          | B               | 542          | 551        |
| 3K6S          | B               | 568          | 579        |
| 3K6S          | B               | 581          | 590        |
| 3KAA          | A               | 33           | 44         |
| 3KJ4          | A               | 27           | 33         |
| 3KS9          | A               | 432          | 439        |
| 3KS9          | B               | 432          | 439        |
| 3KTZ          | A               | 44           | 50         |
| 3L5H          | A               | 112          | 122        |
| 3L5H          | A               | 150          | 160        |
| 3L5H          | A               | 436          | 444        |
| 3LAD          | A               | 48           | 53         |
| 3LAD          | B               | 48           | 53         |
| 3LAQ          | A               | 12           | 20         |
| 3LAQ          | A               | 34           | 43         |
| 3LAQ          | U               | 6            | 12         |
| 3LAQ          | U               | 71           | 76         |
| 3LAQ          | U               | 99           | 106        |
| 3LAQ          | U               | 169          | 174        |

Additional file 1: Table S3: Disulphide loops at the surface of PDB proteins.

| <b>PDB-ID</b> | <b>Chain-ID</b> | <b>Start</b> | <b>End</b> |
|---------------|-----------------|--------------|------------|
| 3LAQ          | U               | 195          | 203        |
| 3LAQ          | U               | 265          | 270        |
| 3LB6          | C               | 145          | 155        |
| 3LMK          | A               | 419          | 426        |
| 3LMK          | B               | 419          | 426        |
| 3LPO          | A               | 602          | 613        |
| 3LQM          | A               | 66           | 74         |
| 3LRK          | A               | 223          | 230        |
| 3M1C          | B               | 149          | 160        |
| 3M7O          | A               | 102          | 112        |
| 3M9Z          | A               | 94           | 105        |
| 3MAW          | A               | 338          | 347        |
| 3MAW          | A               | 362          | 370        |
| 3MAW          | A               | 394          | 399        |
| 3MC2          | A               | 166          | 177        |
| 3MQ4          | A               | 430          | 437        |
| 3MTX          | A               | 97           | 107        |
| 3MUU          | A               | 19           | 25         |
| 3MUU          | A               | 428          | 438        |

Additional file 1: Table S3: Disulphide loops at the surface of PDB proteins.

| <b>PDB-ID</b> | <b>Chain-ID</b> | <b>Start</b> | <b>End</b> |
|---------------|-----------------|--------------|------------|
| 3MUU          | B               | 19           | 25         |
| 3MUU          | B               | 428          | 438        |
| 3MUU          | C               | 19           | 25         |
| 3MUU          | C               | 428          | 438        |
| 3MUW          | A               | 62           | 68         |
| 3MUW          | A               | 63           | 68         |
| 3MUW          | A               | 68           | 78         |
| 3MUW          | A               | 301          | 306        |
| 3MUW          | A               | 370          | 376        |
| 3MUW          | A               | 370          | 380        |
| 3MUW          | A               | 376          | 380        |
| 3MUW          | D               | 62           | 68         |
| 3MUW          | D               | 63           | 68         |
| 3MUW          | D               | 68           | 78         |
| 3MUW          | D               | 301          | 306        |
| 3MUW          | D               | 370          | 376        |
| 3MUW          | D               | 370          | 380        |
| 3MUW          | D               | 376          | 380        |
| 3MUW          | E               | 62           | 68         |

Additional file 1: Table S3: Disulphide loops at the surface of PDB proteins.

| <b>PDB-ID</b> | <b>Chain-ID</b> | <b>Start</b> | <b>End</b> |
|---------------|-----------------|--------------|------------|
| 3MUW          | E               | 63           | 68         |
| 3MUW          | E               | 68           | 78         |
| 3MUW          | E               | 301          | 306        |
| 3MUW          | E               | 370          | 376        |
| 3MUW          | E               | 370          | 380        |
| 3MUW          | E               | 376          | 380        |
| 3MUW          | F               | 62           | 68         |
| 3MUW          | F               | 63           | 68         |
| 3MUW          | F               | 68           | 78         |
| 3MUW          | F               | 301          | 306        |
| 3MUW          | F               | 370          | 376        |
| 3MUW          | F               | 370          | 380        |
| 3MUW          | F               | 376          | 380        |
| 3MUW          | U               | 16           | 25         |
| 3MUW          | U               | 19           | 25         |
| 3MUW          | X               | 16           | 25         |
| 3MUW          | X               | 19           | 25         |
| 3MUW          | Y               | 16           | 25         |
| 3MUW          | Y               | 19           | 25         |

Additional file 1: Table S3: Disulphide loops at the surface of PDB proteins.

| <b>PDB-ID</b> | <b>Chain-ID</b> | <b>Start</b> | <b>End</b> |
|---------------|-----------------|--------------|------------|
| 3MUW          | Z               | 16           | 25         |
| 3MUW          | Z               | 19           | 25         |
| 3MYW          | I               | 18           | 26         |
| 3MYW          | I               | 36           | 43         |
| 3MYW          | I               | 45           | 53         |
| 3NK3          | A               | 334          | 340        |
| 3NK3          | B               | 334          | 340        |
| 3NKM          | A               | 79           | 85         |
| 3NKM          | A               | 123          | 129        |
| 3NKM          | A               | 770          | 780        |
| 3NSJ          | A               | 396          | 406        |
| 3NSJ          | A               | 524          | 533        |
| 3NVN          | A               | 77           | 86         |
| 3NVQ          | A               | 120          | 126        |
| 3NVQ          | A               | 143          | 152        |
| 3NVQ          | A               | 587          | 596        |
| 3NVQ          | E               | 120          | 126        |
| 3NVQ          | E               | 143          | 152        |
| 3NVQ          | E               | 587          | 596        |

Additional file 1: Table S3: Disulphide loops at the surface of PDB proteins.

| <b>PDB-ID</b> | <b>Chain-ID</b> | <b>Start</b> | <b>End</b> |
|---------------|-----------------|--------------|------------|
| 3OG4          | B               | 56           | 64         |
| 3OJY          | A               | 489          | 498        |
| 3OJY          | B               | 68           | 79         |
| 3OJY          | B               | 471          | 480        |
| 3P1I          | A               | 116          | 126        |
| 3P2T          | A               | 133          | 143        |
| 3P9D          | B               | 335          | 340        |
| 3P9D          | B               | 359          | 365        |
| 3P9D          | D               | 275          | 283        |
| 3P9D          | D               | 399          | 403        |
| 3P9D          | G               | 368          | 374        |
| 3P9D          | H               | 42           | 49         |
| 3P9D          | J               | 335          | 340        |
| 3P9D          | J               | 359          | 365        |
| 3P9D          | L               | 275          | 283        |
| 3P9D          | L               | 399          | 403        |
| 3P9D          | O               | 368          | 374        |
| 3P9D          | P               | 42           | 49         |
| 3PLC          | A               | 44           | 55         |



Additional file 1: Table S3: Disulphide loops at the surface of PDB proteins.

| <b>PDB-ID</b> | <b>Chain-ID</b> | <b>Start</b> | <b>End</b> |
|---------------|-----------------|--------------|------------|
| 3PLC          | A               | 56           | 61         |
| 3POY          | A               | 703          | 714        |
| 3POY          | A               | 725          | 735        |
| 3POY          | A               | 906          | 914        |
| 3POY          | A               | 1110         | 1121       |
| 3POY          | A               | 1132         | 1142       |
| 3PRX          | B               | 1485         | 1490       |
| 3PRX          | B               | 1616         | 1625       |
| 3QCW          | A               | 687          | 698        |
| 3QCW          | A               | 709          | 719        |
| 3QCW          | A               | 890          | 898        |
| 3QCW          | A               | 1094         | 1105       |
| 3QCW          | A               | 1116         | 1126       |
| 3QIB          | D               | 69           | 75         |
| 3QO4          | A               | 133          | 144        |
| 3QS7          | E               | 103          | 114        |
| 3QS7          | E               | 232          | 241        |
| 3QS7          | E               | 381          | 392        |
| 3QS7          | F               | 103          | 114        |

Additional file 1: Table S3: Disulphide loops at the surface of PDB proteins.

| <b>PDB-ID</b> | <b>Chain-ID</b> | <b>Start</b> | <b>End</b> |
|---------------|-----------------|--------------|------------|
| 3QS7          | F               | 232          | 241        |
| 3QS7          | F               | 381          | 392        |
| 3R0L          | B               | 75           | 86         |
| 3R0L          | D               | 75           | 86         |
| 3RJR          | A               | 256          | 265        |
| 3RJR          | B               | 256          | 265        |
| 3RKI          | A               | 322          | 333        |
| 3RKI          | A               | 358          | 367        |
| 3RKI          | A               | 382          | 393        |
| 3RKI          | A               | 416          | 422        |
| 3RKI          | B               | 322          | 333        |
| 3RKI          | B               | 358          | 367        |
| 3RKI          | B               | 382          | 393        |
| 3RKI          | B               | 416          | 422        |
| 3RKI          | C               | 322          | 333        |
| 3RKI          | C               | 358          | 367        |
| 3RKI          | C               | 382          | 393        |
| 3RKI          | C               | 416          | 422        |
| 3RLG          | A               | 51           | 57         |

Additional file 1: Table S3: Disulphide loops at the surface of PDB proteins.

| <b>PDB-ID</b> | <b>Chain-ID</b> | <b>Start</b> | <b>End</b> |
|---------------|-----------------|--------------|------------|
| 3RRC          | A               | 230          | 237        |
| 3RRC          | B               | 230          | 237        |
| 3S2K          | A               | 893          | 904        |
| 3S2K          | A               | 1207         | 1218       |
| 3S2K          | B               | 893          | 904        |
| 3S2K          | B               | 1207         | 1218       |
| 3S8J          | A               | 142          | 153        |
| 3S94          | A               | 286          | 297        |
| 3S94          | A               | 592          | 603        |
| 3S98          | A               | 52           | 60         |
| 3S98          | A               | 256          | 264        |
| 3SDY          | B               | 144          | 148        |
| 3SE4          | A               | 52           | 60         |
| 3SE4          | A               | 256          | 264        |
| 3SE4          | C               | 58           | 66         |
| 3TBD          | A               | 52           | 60         |
| 3TBD          | A               | 270          | 279        |
| 3TBD          | A               | 290          | 299        |
| 3TGL          | A               | 235          | 244        |

Additional file 1: Table S3: Disulphide loops at the surface of PDB proteins.

| <b>PDB-ID</b> | <b>Chain-ID</b> | <b>Start</b> | <b>End</b> |
|---------------|-----------------|--------------|------------|
| 3TON          | A               | 1557         | 1568       |
| 3ZYO          | A               | 59           | 65         |
| 3ZYO          | A               | 63           | 74         |
| 4SBV          | A               | 169          | 176        |
| 4SBV          | B               | 169          | 176        |
| 4SBV          | C               | 169          | 176        |
| 6RLX          | A               | 6            | 11         |
| 6RLX          | C               | 6            | 11         |
| 7MDH          | A               | 24           | 29         |
| 7MDH          | B               | 24           | 29         |

Additional file 1: Table S4: Disulphide loops at the interface of PDB proteins.

| <b>PDB-ID</b> | <b>Chain-ID</b> | <b>Start</b> | <b>End</b> |
|---------------|-----------------|--------------|------------|
| PDB-ID        | CHAIN-ID        | START        | END        |
| 1A22          | B               | 238          | 248        |
| 1AN3          | A               | 180          | 188        |

Additional file 1: Table S4: Disulphide loops at the interface of PDB proteins.

| <b>PDB-ID</b> | <b>Chain-ID</b> | <b>Start</b> | <b>End</b> |
|---------------|-----------------|--------------|------------|
| 1AN3          | B               | 14           | 24         |
| 1AN3          | C               | 14           | 24         |
| 1APH          | A               | 6            | 11         |
| 1APY          | A               | 41           | 46         |
| 1APY          | C               | 41           | 46         |
| 1ATJ          | A               | 44           | 49         |
| 1ATJ          | D               | 44           | 49         |
| 1ATJ          | E               | 44           | 49         |
| 1ATJ          | F               | 44           | 49         |
| 1AUT          | L               | 98           | 109        |
| 1B17          | A               | 6            | 11         |
| 1B1Z          | A               | 87           | 98         |
| 1B1Z          | B               | 87           | 98         |
| 1B1Z          | C               | 87           | 98         |
| 1B1Z          | D               | 87           | 98         |
| 1BCP          | B               | 192          | 199        |
| 1BCP          | D               | 103          | 109        |
| 1BCP          | F               | 92           | 98         |
| 1BHT          | A               | 74           | 84         |

Additional file 1: Table S4: Disulphide loops at the interface of PDB proteins.

| <b>PDB-ID</b> | <b>Chain-ID</b> | <b>Start</b> | <b>End</b> |
|---------------|-----------------|--------------|------------|
| 1BP3          | B               | 212          | 222        |
| 1C3A          | A               | 4            | 15         |
| 1C3A          | B               | 204          | 215        |
| 1C5M          | D               | 22           | 27         |
| 1C5M          | F               | 1            | 12         |
| 1CDT          | A               | 42           | 53         |
| 1CDT          | A               | 54           | 59         |
| 1CDT          | B               | 42           | 53         |
| 1CDT          | B               | 54           | 59         |
| 1CN4          | A               | 28           | 38         |
| 1CQE          | A               | 59           | 69         |
| 1CQE          | B               | 59           | 69         |
| 1CSB          | B               | 108          | 119        |
| 1CVU          | A               | 59           | 69         |
| 1CVU          | B               | 2059         | 2069       |
| 1CVW          | L               | 91           | 102        |
| 1DN2          | E               | 2            | 12         |
| 1DN2          | F               | 2            | 12         |
| 1DX5          | I               | 399          | 407        |

Additional file 1: Table S4: Disulphide loops at the interface of PDB proteins.

| <b>PDB-ID</b> | <b>Chain-ID</b> | <b>Start</b> | <b>End</b> |
|---------------|-----------------|--------------|------------|
| 1DX5          | I               | 427          | 437        |
| 1EDM          | B               | 51           | 62         |
| 1EDM          | C               | 51           | 62         |
| 1EDM          | C               | 73           | 82         |
| 1ES7          | B               | 240          | 244        |
| 1ETH          | C               | 286          | 297        |
| 1EXT          | A               | 139          | 150        |
| 1EXT          | A               | 156          | 162        |
| 1EXT          | B               | 139          | 150        |
| 1F45          | A               | 109          | 120        |
| 1F6F          | A               | 7            | 14         |
| 1F6F          | A               | 192          | 197        |
| 1F6F          | C               | 12           | 22         |
| 1FL7          | B               | 87           | 94         |
| 1FLC          | A               | 332          | 338        |
| 1FLC          | C               | 332          | 338        |
| 1FLC          | E               | 332          | 338        |
| 1G1Q          | C               | 144          | 153        |
| 1G1Q          | D               | 122          | 133        |

Additional file 1: Table S4: Disulphide loops at the interface of PDB proteins.

| <b>PDB-ID</b> | <b>Chain-ID</b> | <b>Start</b> | <b>End</b> |
|---------------|-----------------|--------------|------------|
| 1G1Q          | D               | 144          | 153        |
| 1G72          | B               | 6            | 12         |
| 1G72          | D               | 6            | 12         |
| 1G9I          | I               | 309          | 317        |
| 1GH7          | A               | 11           | 21         |
| 1GH7          | A               | 226          | 236        |
| 1GH7          | B               | 11           | 21         |
| 1GH7          | B               | 226          | 236        |
| 1GL0          | I               | 17           | 27         |
| 1GL1          | I               | 17           | 28         |
| 1GPQ          | A               | 57           | 62         |
| 1GPQ          | B               | 57           | 62         |
| 1H4I          | B               | 6            | 12         |
| 1H4I          | D               | 6            | 12         |
| 1HC9          | A               | 29           | 33         |
| 1HCN          | B               | 93           | 100        |
| 1HDM          | B               | 25           | 35         |
| 1HSL          | A               | 38           | 45         |
| 1HSL          | B               | 38           | 45         |



Additional file 1: Table S4: Disulphide loops at the interface of PDB proteins.

| <b>PDB-ID</b> | <b>Chain-ID</b> | <b>Start</b> | <b>End</b> |
|---------------|-----------------|--------------|------------|
| 1HYR          | A               | 96           | 105        |
| 1HYR          | A               | 99           | 110        |
| 1HYR          | B               | 96           | 105        |
| 1HYR          | B               | 99           | 110        |
| 1IAR          | B               | 9            | 19         |
| 1ICF          | I               | 227          | 234        |
| 1ILL          | R               | 4            | 14         |
| 1ILM          | B               | 10           | 20         |
| 1ING          | A               | 124          | 129        |
| 1ING          | B               | 124          | 129        |
| 1IOD          | G               | 417          | 422        |
| 1ISF          | A               | 239          | 248        |
| 1ISF          | B               | 239          | 248        |
| 1IVO          | C               | 33           | 42         |
| 1IVO          | D               | 33           | 42         |
| 1IVY          | A               | 213          | 218        |
| 1IVY          | B               | 213          | 218        |
| 1J34          | C               | 418          | 423        |
| 1JK4          | A               | 74           | 79         |

Additional file 1: Table S4: Disulphide loops at the interface of PDB proteins.

| <b>PDB-ID</b> | <b>Chain-ID</b> | <b>Start</b> | <b>End</b> |
|---------------|-----------------|--------------|------------|
| 1JK4          | B               | 1            | 6          |
| 1JV2          | B               | 588          | 598        |
| 1JZN          | A               | 3            | 14         |
| 1JZN          | B               | 3            | 14         |
| 1JZN          | C               | 3            | 14         |
| 1JZN          | D               | 3            | 14         |
| 1JZN          | E               | 3            | 14         |
| 1K7T          | A               | 35           | 40         |
| 1K7T          | A               | 78           | 83         |
| 1K8I          | B               | 24           | 34         |
| 1K9I          | A               | 256          | 267        |
| 1K9I          | C               | 256          | 267        |
| 1K9I          | D               | 256          | 267        |
| 1K9I          | E               | 256          | 267        |
| 1K9I          | F               | 256          | 267        |
| 1K9I          | I               | 256          | 267        |
| 1K9I          | J               | 256          | 267        |
| 1KBA          | A               | 59           | 64         |
| 1KBA          | B               | 27           | 31         |

Additional file 1: Table S4: Disulphide loops at the interface of PDB proteins.

| <b>PDB-ID</b> | <b>Chain-ID</b> | <b>Start</b> | <b>End</b> |
|---------------|-----------------|--------------|------------|
| 1KBA          | B               | 59           | 64         |
| 1KCG          | A               | 96           | 105        |
| 1KCG          | A               | 99           | 110        |
| 1KCG          | B               | 96           | 105        |
| 1KCG          | B               | 99           | 110        |
| 1KIG          | L               | 389          | 400        |
| 1KTZ          | B               | 115          | 120        |
| 1LBE          | A               | 239          | 248        |
| 1LBE          | B               | 239          | 248        |
| 1LI1          | A               | 65           | 71         |
| 1LI1          | A               | 176          | 182        |
| 1LI1          | B               | 65           | 71         |
| 1LI1          | B               | 176          | 182        |
| 1LI1          | C               | 65           | 71         |
| 1LI1          | C               | 176          | 182        |
| 1LI1          | D               | 65           | 71         |
| 1LI1          | D               | 176          | 182        |
| 1LI1          | E               | 65           | 71         |
| 1LI1          | E               | 176          | 182        |

Additional file 1: Table S4: Disulphide loops at the interface of PDB proteins.

| <b>PDB-ID</b> | <b>Chain-ID</b> | <b>Start</b> | <b>End</b> |
|---------------|-----------------|--------------|------------|
| 1LI1          | F               | 65           | 71         |
| 1LI1          | F               | 176          | 182        |
| 1LK1          | C               | 29           | 33         |
| 1LK1          | C               | 48           | 59         |
| 1LK1          | F               | 29           | 33         |
| 1LK1          | F               | 48           | 59         |
| 1LK9          | A               | 41           | 50         |
| 1LK9          | B               | 41           | 50         |
| 1LNL          | A               | 47           | 58         |
| 1LRW          | B               | 6            | 12         |
| 1LRW          | D               | 6            | 12         |
| 1LYA          | A               | 46           | 53         |
| 1LYA          | C               | 46           | 53         |
| 1M3D          | A               | 65           | 71         |
| 1M3D          | A               | 176          | 182        |
| 1M3D          | B               | 65           | 71         |
| 1M3D          | B               | 176          | 182        |
| 1M3D          | C               | 64           | 70         |
| 1M3D          | C               | 173          | 180        |

Additional file 1: Table S4: Disulphide loops at the interface of PDB proteins.

| <b>PDB-ID</b> | <b>Chain-ID</b> | <b>Start</b> | <b>End</b> |
|---------------|-----------------|--------------|------------|
| 1M3D          | D               | 65           | 71         |
| 1M3D          | D               | 176          | 182        |
| 1M3D          | E               | 65           | 71         |
| 1M3D          | E               | 176          | 182        |
| 1M3D          | F               | 64           | 70         |
| 1M3D          | F               | 173          | 180        |
| 1MCT          | I               | 16           | 27         |
| 1MHL          | C               | 221          | 232        |
| 1MHL          | D               | 221          | 232        |
| 1MOX          | B               | 191          | 199        |
| 1MOX          | C               | 34           | 43         |
| 1MOX          | D               | 34           | 43         |
| 1MX1          | A               | 1274         | 1285       |
| 1MX1          | B               | 2274         | 2285       |
| 1MX1          | C               | 3274         | 3285       |
| 1MX1          | D               | 4274         | 4285       |
| 1MX1          | E               | 5274         | 5285       |
| 1MX1          | F               | 6274         | 6285       |
| 1N69          | B               | 36           | 47         |

Additional file 1: Table S4: Disulphide loops at the interface of PDB proteins.

| <b>PDB-ID</b> | <b>Chain-ID</b> | <b>Start</b> | <b>End</b> |
|---------------|-----------------|--------------|------------|
| 1N8Z          | C               | 565          | 574        |
| 1OB1          | C               | 7            | 18         |
| 1OB1          | C               | 30           | 41         |
| 1OC0          | B               | 25           | 31         |
| 1OQE          | K               | 9            | 20         |
| 1OQE          | L               | 9            | 20         |
| 1OQE          | M               | 9            | 20         |
| 1OQE          | N               | 9            | 20         |
| 1OQE          | O               | 9            | 20         |
| 1OQE          | P               | 9            | 20         |
| 1OQE          | Q               | 9            | 20         |
| 1OQE          | R               | 9            | 20         |
| 1PBI          | A               | 14           | 22         |
| 1PFX          | L               | 88           | 99         |
| 1QFX          | A               | 394          | 402        |
| 1QFX          | B               | 394          | 402        |
| 1QKD          | A               | 43           | 54         |
| 1QKD          | A               | 55           | 60         |
| 1QKD          | B               | 43           | 54         |

Additional file 1: Table S4: Disulphide loops at the interface of PDB proteins.

| <b>PDB-ID</b> | <b>Chain-ID</b> | <b>Start</b> | <b>End</b> |
|---------------|-----------------|--------------|------------|
| 1QKD          | B               | 55           | 60         |
| 1QO3          | C               | 145          | 150        |
| 1R46          | A               | 56           | 63         |
| 1R46          | B               | 56           | 63         |
| 1RD8          | B               | 144          | 148        |
| 1RD8          | D               | 144          | 148        |
| 1RD8          | F               | 144          | 148        |
| 1RFN          | B               | 88           | 99         |
| 1RLX          | A               | 6            | 11         |
| 1RUY          | I               | 644          | 648        |
| 1RUY          | K               | 644          | 648        |
| 1RUY          | M               | 644          | 648        |
| 1T7H          | A               | 5            | 13         |
| 1T7H          | B               | 5            | 13         |
| 1TAB          | I               | 24           | 32         |
| 1ULK          | A               | 36           | 40         |
| 1ULK          | A               | 77           | 81         |
| 1UMR          | A               | 4            | 15         |
| 1UMR          | C               | 204          | 215        |

Additional file 1: Table S4: Disulphide loops at the interface of PDB proteins.

| <b>PDB-ID</b> | <b>Chain-ID</b> | <b>Start</b> | <b>End</b> |
|---------------|-----------------|--------------|------------|
| 1UUZ          | A               | 59           | 64         |
| 1V0Z          | A               | 130          | 135        |
| 1V0Z          | C               | 130          | 135        |
| 1V0Z          | D               | 130          | 135        |
| 1V4L          | A               | 4            | 15         |
| 1V4L          | B               | 204          | 215        |
| 1V4L          | C               | 4            | 15         |
| 1V4L          | D               | 204          | 215        |
| 1V4L          | E               | 4            | 15         |
| 1V4L          | F               | 204          | 215        |
| 1W1C          | A               | 59           | 64         |
| 1W1C          | B               | 59           | 64         |
| 1W1E          | A               | 61           | 66         |
| 1W1E          | B               | 61           | 66         |
| 1WUW          | A               | 16           | 25         |
| 1WUW          | B               | 66           | 75         |
| 1XDT          | R               | 134          | 143        |
| 1XDT          | T               | 461          | 471        |
| 1XG2          | B               | 9            | 18         |



Additional file 1: Table S4: Disulphide loops at the interface of PDB proteins.

| <b>PDB-ID</b> | <b>Chain-ID</b> | <b>Start</b> | <b>End</b> |
|---------------|-----------------|--------------|------------|
| 1XTA          | A               | 167          | 174        |
| 1XTA          | A               | 170          | 179        |
| 1XTA          | B               | 167          | 174        |
| 1XTA          | B               | 170          | 179        |
| 1XU1          | R               | 89           | 100        |
| 1XU1          | R               | 93           | 104        |
| 1XU1          | S               | 89           | 100        |
| 1XU1          | S               | 93           | 104        |
| 1XU1          | T               | 89           | 100        |
| 1XU1          | T               | 93           | 104        |
| 1XWD          | B               | 87           | 94         |
| 1Y4M          | A               | 86           | 93         |
| 1Y4M          | B               | 86           | 93         |
| 1Y4M          | C               | 86           | 93         |
| 1YPO          | A               | 144          | 155        |
| 1YPO          | B               | 144          | 155        |
| 1YPQ          | A               | 144          | 155        |
| 1YPQ          | B               | 144          | 155        |
| 1YUK          | B               | 437          | 448        |

Additional file 1: Table S4: Disulphide loops at the interface of PDB proteins.

| <b>PDB-ID</b> | <b>Chain-ID</b> | <b>Start</b> | <b>End</b> |
|---------------|-----------------|--------------|------------|
| 1YUK          | B               | 450          | 459        |
| 1YWH          | A               | 6            | 12         |
| 1YWH          | A               | 71           | 76         |
| 1YWH          | A               | 98           | 105        |
| 1YWH          | C               | 6            | 12         |
| 1YWH          | C               | 98           | 105        |
| 1YWH          | E               | 6            | 12         |
| 1YWH          | E               | 71           | 76         |
| 1YWH          | G               | 6            | 12         |
| 1YWH          | G               | 98           | 105        |
| 1YWH          | I               | 6            | 12         |
| 1YWH          | I               | 98           | 105        |
| 1YWH          | K               | 6            | 12         |
| 1YWH          | K               | 98           | 105        |
| 1YWH          | M               | 6            | 12         |
| 1YWH          | M               | 98           | 105        |
| 1YWH          | O               | 6            | 12         |
| 1YWH          | O               | 71           | 76         |
| 1ZEI          | C               | 38           | 43         |

Additional file 1: Table S4: Disulphide loops at the interface of PDB proteins.

| <b>PDB-ID</b> | <b>Chain-ID</b> | <b>Start</b> | <b>End</b> |
|---------------|-----------------|--------------|------------|
| 1ZEI          | D               | 38           | 43         |
| 2ATY          | A               | 154          | 159        |
| 2ATY          | A               | 154          | 161        |
| 2ATY          | A               | 156          | 161        |
| 2ATY          | B               | 154          | 159        |
| 2ATY          | B               | 154          | 161        |
| 2AW2          | B               | 4            | 15         |
| 2B9B          | A               | 324          | 333        |
| 2BPD          | A               | 119          | 130        |
| 2BPD          | B               | 119          | 130        |
| 2COV          | D               | 413          | 418        |
| 2COV          | E               | 413          | 418        |
| 2COV          | F               | 413          | 418        |
| 2COV          | G               | 413          | 418        |
| 2COV          | H               | 413          | 418        |
| 2COV          | I               | 413          | 418        |
| 2DRF          | B               | 279          | 289        |
| 2DTG          | E               | 228          | 237        |
| 2E3X          | B               | 2            | 13         |

Additional file 1: Table S4: Disulphide loops at the interface of PDB proteins.

| <b>PDB-ID</b> | <b>Chain-ID</b> | <b>Start</b> | <b>End</b> |
|---------------|-----------------|--------------|------------|
| 2F2L          | A               | 390          | 396        |
| 2FT3          | A               | 27           | 33         |
| 2FT3          | B               | 27           | 33         |
| 2G81          | I               | 24           | 32         |
| 2GIY          | A               | 314          | 323        |
| 2H62          | C               | 40           | 44         |
| 2H7Z          | A               | 55           | 66         |
| 2H7Z          | B               | 13           | 21         |
| 2HEV          | R               | 31           | 42         |
| 2OTP          | A               | 132          | 142        |
| 2OTP          | B               | 132          | 142        |
| 2QBX          | A               | 105          | 115        |
| 2QC1          | A               | 29           | 33         |
| 2QTS          | A               | 173          | 180        |
| 2QTS          | B               | 173          | 180        |
| 2QTS          | C               | 173          | 180        |
| 2R0R          | A               | 36           | 47         |
| 2R0R          | B               | 36           | 47         |
| 2R6P          | C               | 105          | 116        |

Additional file 1: Table S4: Disulphide loops at the interface of PDB proteins.

| <b>PDB-ID</b> | <b>Chain-ID</b> | <b>Start</b> | <b>End</b> |
|---------------|-----------------|--------------|------------|
| 2V5E          | A               | 161          | 167        |
| 2WBA          | A               | 52           | 57         |
| 2WBA          | B               | 52           | 57         |
| 2WFU          | A               | 6            | 11         |
| 2WPH          | E               | 88           | 99         |
| 2WRH          | K               | 644          | 648        |
| 2XOT          | A               | 34           | 40         |
| 2XOT          | A               | 38           | 47         |
| 2XOT          | B               | 38           | 47         |
| 2XWT          | C               | 31           | 41         |
| 2YIL          | A               | 82           | 86         |
| 2YIL          | B               | 82           | 86         |
| 2Z64          | C               | 95           | 105        |
| 3ALQ          | T               | 104          | 112        |
| 3B2D          | C               | 102          | 112        |
| 3B2D          | D               | 102          | 112        |
| 3BDW          | A               | 61           | 72         |
| 3BDW          | B               | 119          | 130        |
| 3BPN          | B               | 9            | 19         |

Additional file 1: Table S4: Disulphide loops at the interface of PDB proteins.

| <b>PDB-ID</b> | <b>Chain-ID</b> | <b>Start</b> | <b>End</b> |
|---------------|-----------------|--------------|------------|
| 3BT2          | A               | 33           | 42         |
| 3BT2          | B               | 25           | 31         |
| 3BT2          | U               | 6            | 12         |
| 3BT2          | U               | 266          | 271        |
| 3C9A          | D               | 84           | 93         |
| 3EVS          | C               | 21           | 25         |
| 3FF8          | C               | 75           | 86         |
| 3FKU          | D               | 144          | 148        |
| 3FKU          | Z               | 104          | 109        |
| 3FXI          | C               | 95           | 105        |
| 3FXI          | D               | 95           | 105        |
| 3GIS          | X               | 399          | 407        |
| 3GIS          | X               | 427          | 437        |
| 3GRO          | B               | 152          | 160        |
| 3HH2          | A               | 6            | 16         |
| 3HH2          | B               | 6            | 16         |
| 3HH2          | C               | 216          | 227        |
| 3HH7          | A               | 58           | 63         |
| 3HH7          | B               | 58           | 63         |

Additional file 1: Table S4: Disulphide loops at the interface of PDB proteins.

| <b>PDB-ID</b> | <b>Chain-ID</b> | <b>Start</b> | <b>End</b> |
|---------------|-----------------|--------------|------------|
| 3IXY          | C               | 105          | 116        |
| 3JVF          | C               | 259          | 263        |
| 3JVF          | C               | 263          | 272        |
| 3K6S          | A               | 476          | 487        |
| 3K6S          | B               | 169          | 176        |
| 3K6S          | B               | 581          | 590        |
| 3LAQ          | A               | 34           | 43         |
| 3LAQ          | U               | 6            | 12         |
| 3M1C          | B               | 149          | 160        |
| 3MYW          | I               | 18           | 26         |
| 3MYW          | I               | 36           | 43         |
| 3MYW          | I               | 45           | 53         |
| 3NVQ          | A               | 587          | 596        |
| 3NVQ          | E               | 587          | 596        |
| 3R0L          | B               | 75           | 86         |
| 6RLX          | A               | 6            | 11         |
| 6RLX          | C               | 6            | 11         |

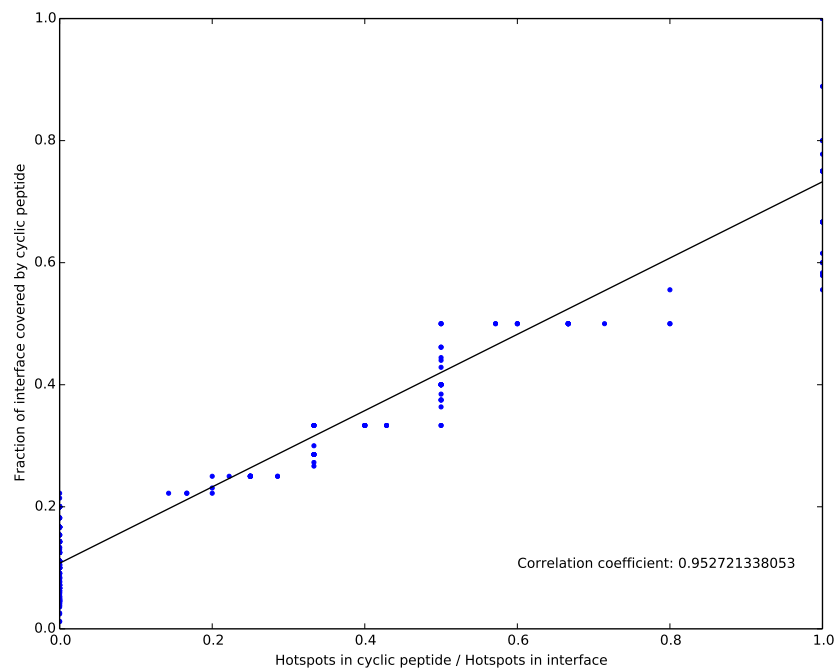

Additional file 1: Figure S1: The proportion of protein-protein interface hotspots contained in a cyclic peptide is well correlated with the fraction of the interface residues contained in the cyclic peptide.



Additional file 1: Table S1: *De-novo* disulphide loop structure model accuracy vs. X-ray crystal structures. Five PEP-FOLD models were calculated for each PDB loop sequence, with model1 being the lowest energy, and model5 being the highest energy. The CKTNGDC sequence appears twice it appears chain I and chain U of PDB ID 3BT2, and both loops interact with different proteins.

| Loop Sequence | PEP-FOLD model | RMSD  |
|---------------|----------------|-------|
| CVVGYIGERC    | model1         | 2.374 |
| CVVGYIGERC    | model2         | 3.601 |
| CVVGYIGERC    | model3         | 3.077 |
| CVVGYIGERC    | model4         | 3.66  |
| CVVGYIGERC    | model5         | 3.122 |
| CKTNGDC       | model1         | 2.319 |
| CKTNGDC       | model2         | 2.714 |
| CKTNGDC       | model3         | 1.651 |
| CKTNGDC       | model4         | 1.395 |
| CKTNGDC       | model5         | 2.6   |
| CKTNGDC-2     | model1         | 2.393 |
| CKTNGDC-2     | model2         | 2.571 |
| CKTNGDC-2     | model3         | 1.937 |
| CKTNGDC-2     | model4         | 1.878 |
| CKTNGDC-2     | model5         | 2.659 |
| CTKSIPPQC     | model1         | 1.532 |
| CTKSIPPQC     | model2         | 2.466 |
| CTKSIPPQC     | model3         | 2.882 |
| CTKSIPPQC     | model4         | 2.669 |
| CTKSIPPQC     | model5         | 2.156 |
| CSYYQSC       | model1         | 2.033 |
| CSYYQSC       | model2         | 2.707 |
| CSYYQSC       | model3         | 2.704 |
| CSYYQSC       | model4         | 2.661 |
| CSYYQSC       | model5         | 2.662 |
| CKPHDC        | model1         | 1.892 |
| CKPHDC        | model2         | 1.093 |
| CKPHDC        | model3         | 1.265 |
| CKPHDC        | model4         | 1.528 |
| CKPHDC        | model5         | 1.502 |
| CTKSMPPKC     | model1         | 3.358 |
| CTKSMPPKC     | model2         | 3.075 |
| CTKSMPPKC     | model3         | 1.844 |
| CTKSMPPKC     | model4         | 1.822 |
| CTKSMPPKC     | model5         | 2.301 |
| CPTAGPNERVKC  | model1         | 3.845 |
| CPTAGPNERVKC  | model2         | 3.69  |
| CPTAGPNERVKC  | model3         | 3.583 |
| CPTAGPNERVKC  | model4         | 3.467 |
| CPTAGPNERVKC  | model5         | 3.566 |

Additional file 1: Table S2: Human proteins interacting with virus proteins.

| <b>Virus Accession</b> | <b>Virus peptide sequence</b> | <b>Virus Protein Names</b>                               | <b>Human interactor accession</b> | <b>Human interactors name</b>                                                                                          |
|------------------------|-------------------------------|----------------------------------------------------------|-----------------------------------|------------------------------------------------------------------------------------------------------------------------|
| Q1HVB5                 | CELGWC                        | Uncharacterized protein BNLF2b: Human herpesvirus 4      | P28799                            | GRN: Granulins                                                                                                         |
| O41974                 | CKRRC                         | Immediate-early protein, 73: Murid herpesvirus 4         | Q04206                            | RELA: Transcription factor p65                                                                                         |
| P03227                 | CRRPC                         | Single stranded DNA-binding protein: Human herpesvirus 4 | Q9UBX5, Q15723                    | ELF2: ETS-related transcription factor Elf-2, FBLN5 Fibulin-5 Developmental arteries and neural crest EGF-like protein |
| P03254                 | CNSSTDSC                      | Early E1A 32 kDa protein: Human adenovirus 2             | P62826, P20226                    | TBP: TATA-box-binding protein transcription factor, RAN: GTP-binding nuclear protein Ran                               |
| Q77PU6                 | CTIRSDC                       | Protein U90: Human herpesvirus 6B                        | P63165                            | SUMO1: Small ubiquitin-related modifier 1                                                                              |

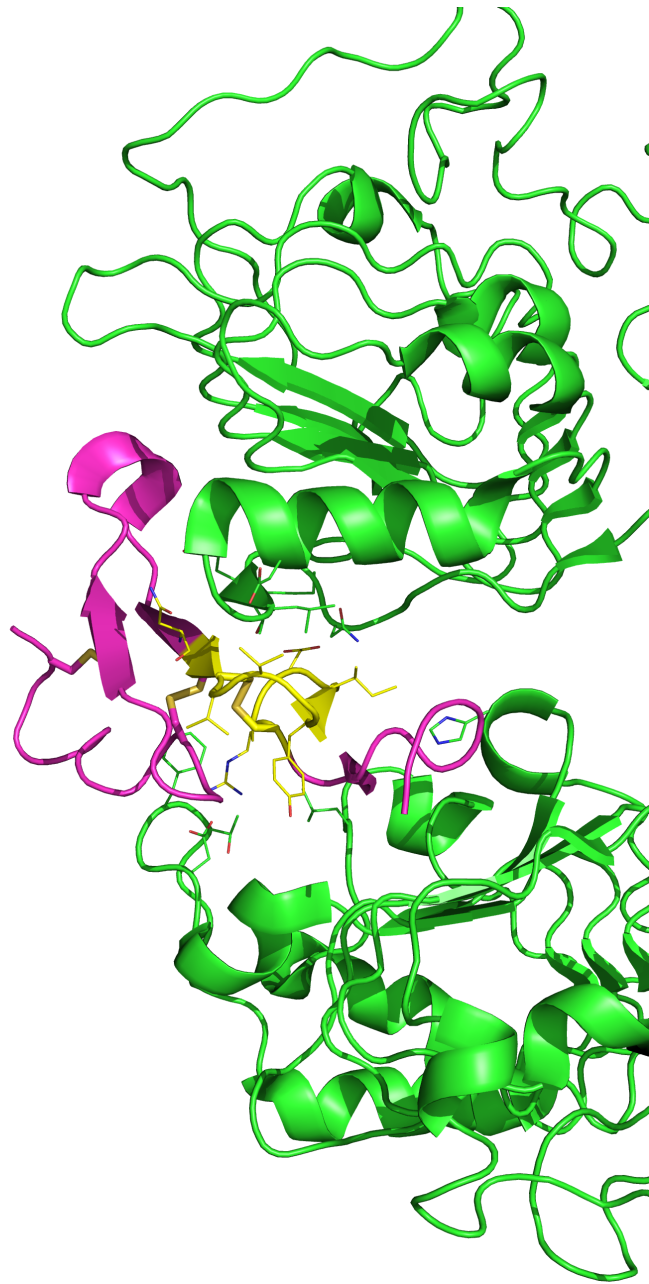

Additional file 1: Figure S2: Three-dimensional structure of the EGF-EGFR interaction. The EGF receptor is in green and EGF is in pink, with the CVVGYIGERC cyclic peptide segment of EGF highlighted in yellow. The cyclic peptide side chains are shown, along with interacting EGFR side chains (those within 4Å of the cyclic peptide).

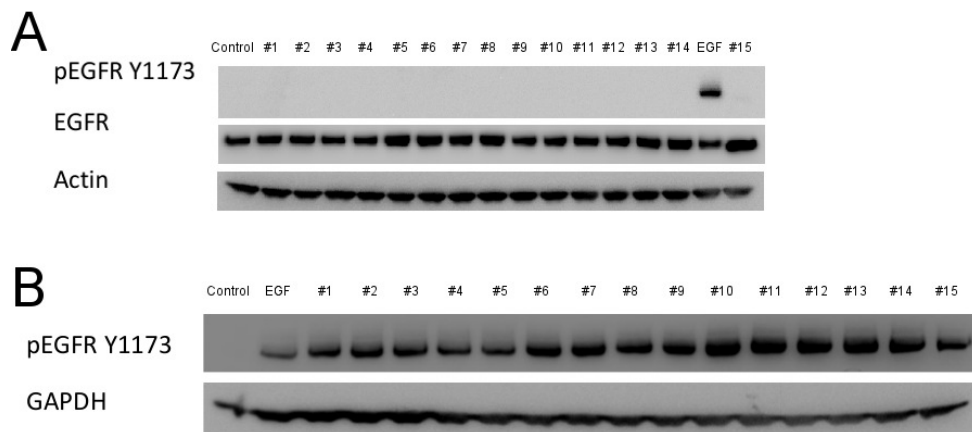

Additional file 1: Figure S3: EGF derived cyclic peptides measured EGF Receptor activation and competitive binding to EGFR with native EGF. (a) EGF receptor activation (revealed by phosphorylation of Tyrosine 1173) with total EGFR and Actin levels. Numbers indicate cyclic peptides. (b) EGF receptor activation after competitive binding of EGF and cyclic peptide to the EGF receptor.
